# Supplementary material
Source: publisher site journal article supplement (https://www.degruyterbrill.com/publication/isbn/9783805911917/downloadAsset/9783805911917_Leseprobe.pdf)
Supplement: Supplementary file 1 [file 9783805911917_Leseprobe.pdf]

§ 2365

*(1) Hat der Erblasser einen Testamentsvollstrecker ernannt, so ist die Ernennung in dem Erbschein anzugeben.*

*(2) Dem Testamentsvollstrecker steht das im § 2362 Abs 1 bestimmte Recht zu.“*

§ 2365

**Vermutung der Richtigkeit des Erbscheins**

**Es wird vermutet, dass demjenigen, welcher in dem Erbschein als Erbe bezeichnet ist, das in dem Erbschein angegebene Erbrecht zustehe und dass er nicht durch andere als die angegebenen Anordnungen beschränkt sei.**

**Materialien:** E I §§ 2076, 2078; II § 2229; III  
§ 2338; Mot V 567, 568; Prot V 683; JAKOBS/  
SCHUBERT ER II 2134–2142.

**Schrifttum**

BÖHRINGER, Erbnachweis für Vermögensrechte mit Grundstücksbezug in den neuen Bundesländern, Rpfleger 1999, 110  
ders, Eignung öffentlicher Urkunden als Nachweis der Erbfolge im Grundbuchverfahren, ZEV 2001, 387  
BUSCHBAUM/SIMON, Das Europäische Nachlasszeugnis, ZEV 2012, 525  
CLAUSEN, Zur Frage des öffentlichen Glaubens bei dem Erbschein, JW 1934, 1837  
DÄUBLER, Der Scheinerbe im Recht der GmbH, GmbH-Rdsch 1963, 181  
DORSEL, Europäische Erbrechtsverordnung und Europäisches Nachlasszeugnis, ZErB 2014, 212  
DÖRNER, Die Verordnung zum Internationalen Erb- und Erbverfahrensrecht ist in Kraft!, ZEV 2012, 505  
DRAKIDIS, Des problèmes nés de l'application des certificats d'héritier, Rev int dr comp 1966, 593  
DUTTA, Die europäische Erbrechtsverordnung vor ihrem Anwendungsbeginn: Zehn ausgewählte Streitstandsminiaturen, IPRax 2015, 32  
FISCHER, Die Stellung des vermeintlichen Erben in der OHG, in: FS C Heymanns Verlag (1965) 271  
GERLITZKY, Rechtswirkungen des Erbscheins und Testamentsvollstreckerzeugnisses (Diss Danzig 1938)

HARTMANN, Zur Bindungswirkung des Erbscheins für die Erbschaftsbesteuerung, UVR 1996, 267  
HEINSHEIMER, Die Tragweite der Erbscheinsvermutung, LZ 1915 Sp 1276  
HERTEL, Nachweis der Unrichtigkeit des Grundbuchs durch ausländische Erbscheine, Anm zu OLG Bremen, DNotZ 2012, 688  
ders, Nachweis der Erbfolge im Grundbuchverfahren – bisher und nach der EuErbVO, ZEV 2013, 539  
JOSEF, Die Stellung des Prozeßrichters gegenüber dem Erbschein, JherJb 65, 161  
ders, Die Bedeutung des Erbscheins für das Prozeßgericht, HessRspr 1914, 315  
ders, Rechtsvermutungen aus Verfügungen der Freiwilligen Gerichtsbarkeit, ZBIFG 14, 152  
ders, Rechtsprechung und Rechtslehre über die wechselseitigen Einwirkungen von Entscheidungen in der freiwilligen und streitigen Gerichtsbarkeit, ZZP 47, 257  
KAUFHOLD, Zur Anerkennung ausländischer öffentlicher Testamente und Erbnachweise im Grundbuchverfahren, ZEV 197, 399  
KEIM, Erfordernis des Nachweises der Erbenstellung im Grundbuchverfahren bei Vorliegen einer transmortalen Vollmacht des Erblassers an seinen Alleinerben, Anm zu OLG Hamm, DNotZ 2013, 692

KLAER, Die Erbscheinsvermutung, ein Beitrag zu der Lehre von den Rechtsvermutungen (Diss Hamburg 1931)  
KNODEL, Anwaltliche Pflichten und Rechte beim Tod des Mandanten, MDR 2006, 121  
KONZEN, Der vermeintliche Erbe in der OHG, ZHR 1945, 29  
KREMBER/LAUX, Die Rechtsstellung des vermeintlichen Erben in der GmbH, BB 1992, 159  
LANGE, Das geplante Europäische Nachlasszeugnis, DNotZ 2012, 168  
ders, Erlöschen einer postmortalen Vollmacht durch Alleinerbschaft des Bevollmächtigten, Anm zu OLG Hamm, ZEV 2013, 341  
LEHMANN, Die Verordnung im Kurzüberblick, ZEV 2012, 533  
LEMKE, Der Erbschein im System der Gutgläubensvorschriften (Diss Göttingen 1981)  
LINDACHER, Vermutungswirkung und öffentlicher Glaube bei einander widersprechenden Erbscheinen, DNotZ 1970, 93  
MANKOWSKI, Das erbrechtliche Viertel nach § 1371 Abs. 1 BGB im deutschen und europäischen Internationalen Privatrecht, ZEV 2014, 121  
OMLOR, Gutgläubensschutz durch das Europäische Nachlasszeugnis, ErbR 2015, 286  
MEDICUS, Besitz, Grundbuch und Erbschein als Rechtsscheinsträger, Jura 2001, 294  
MEYER, Der öffentliche Glaube des Erbscheins nach dem deutschen BGB (Diss Erlangen 1936)  
RÖSSLER, Inhalt des Erbscheins ist nicht zwingend für das Besteuerungsverfahren, DStZ 1996, 575

SCHMIDT, Der Erbnachweis in Deutschland ab 2015: Erbschein vs. Europäisches Nachlasszeugnis, ZEV 2014, 389  
SIMON/BUSCHBAUM, Die neue EU-Erbrechtsverordnung, NJW 2012, 2393  
SÜSS, Das Europäische Nachlasszeugnis, ZEuP 2013, 725  
TIEDTKE, Gutgläubiger Erwerb im bürgerlichen Recht (1985)  
WALKER, Der Vollzug der Arbeitgebererbfolge mit einem vermeintlichen Erben (1985)  
WEFERS, Zur Vermutungswirkung des Erbscheins und zur Nachforschungspflicht, NJW 1996, 2119  
WIEGAND, Der öffentliche Glaube des Erbscheins, JuS 1975, 283  
ders, Rechtsschein und Vertrauensschutz bei Verfügungsgeschäften, JuS 1977, 145  
WILSCH, Die Verordnung in der deutschen Grundbuchpraxis, ZEV 2012, 530  
ders, Kostenrechtsmodernisierung: Verfahrenskosten nach dem GNotKG an der Schnittstelle von Grundbuch- und Nachlassrecht, ZEV 2013, 428  
WITTEW, Praxisfragen des Europäischen Nachlasszeugnisses, insbesondere im Verhältnis zu Drittstaaten, AnwBl 2015, 87  
ZENDIG, Die Widerlegung der Rechtsvermutungen, insbesondere der aus dem Grundbuch, dem Erbschein und dem Testamentsvollstreckerverzeugnis (Diss Breslau 1919).

## Systematische Übersicht

### I. Grundsätzliche Wirkungen

|                                      |   |
|--------------------------------------|---|
| <b>des Erbscheins</b> _____          | 1 |
| 1. Rechtsvermutung _____             | 2 |
| 2. Öffentlicher Glaube _____         | 4 |
| 3. Grundlage für die §§ 2366 f _____ | 5 |
| 4. Beweisgrundlage _____             | 6 |

### II. Die Voraussetzungen

|                                      |   |
|--------------------------------------|---|
| <b>der Erbscheinsvermutung</b> _____ | 8 |
|--------------------------------------|---|

### III. Die Tragweite

|                                                                                            |    |
|--------------------------------------------------------------------------------------------|----|
| <b>der Erbscheinsvermutung</b> _____                                                       | 13 |
| 1. Vermutung des Erbrechts _____                                                           | 14 |
| 2. Keine weiteren Beschränkungen _____                                                     | 17 |
| 3. Keine Vermutung für das Bestehen der angegebenen Beschränkungen _____                   | 19 |
| 4. Keine Erstreckung der Vermutung auf die dem Erbrecht zugrunde liegenden Tatsachen _____ | 20 |
| 5. Einander widersprechende Erbscheine oder Erbfolgezeugnisse _____                        | 23 |

§ 2365

|                                                                                 |     |                                                                                         |     |
|---------------------------------------------------------------------------------|-----|-----------------------------------------------------------------------------------------|-----|
| a) Einander widersprechende Erbscheine _____                                    | 23  | 3. Anwendbarkeit der Vermutung gegenüber Behörden, insbesondere Finanzbehörden _____    | 37  |
| b) Erbschein und Testamentsvollstrecker, die einander widersprechen _____       | 24  | 4. Erbschein und Verwaltungsgericht und andere Gerichtsbarkeiten _____                  | 39  |
| c) Erbschein und Europäisches Nachlasszeugnis, die einander widersprechen _____ | 24a | 5. Erbschein und Betreuungs- bzw Familiengericht/Nachlassgericht/Insolvenzgericht _____ | 40  |
| <b>IV. Erbscheinsverwendung in verschiedenen Kontexten</b>                      |     | 6. Erbschein und Zivilprozessgericht _____                                              | 43  |
| 1. Erbschein und Grundbuchamt _____                                             | 25  | a) Reichweite der Vermutung _____                                                       | 44  |
| a) § 35 Abs 1 S 1 GBO _____                                                     | 25  | b) Widerlegung der Vermutung _____                                                      | 48  |
| b) § 35 Abs 1 S 2 GBO _____                                                     | 33  | c) Keine Anwendung im Erbrechtsstreit unter Erbprätendenten _____                       | 48a |
| c) Erbschein erforderlich bei post- oder transmortaler Vollmacht? _____         | 34  | <b>V. Verhältnis zur Vermutung des § 1964</b>                                           | 52  |
| d) Kosten der Grundbuchberichtigung _____                                       | 35  | <b>VI. Entsprechende Anwendung auf andere Zeugnisse</b> _____                           | 53  |
| 2. Erbschein und Handelsregister _____                                          | 36  |                                                                                         |     |

**Alphabetische Übersicht**

|                                                     |              |                                                  |                       |
|-----------------------------------------------------|--------------|--------------------------------------------------|-----------------------|
| Ablieferung des Erbscheins an Nachlassgericht _____ | 48           | Erbrechtsstreit _____                            | 48a ff.               |
| Auflagen _____                                      | 20           | Erbschaftszeugnisse _____                        | 33i                   |
| Aushändigung _____                                  | 9            | – ausländische _____                             | 33i                   |
| Ausländische Erbschaftszeugnisse _____              | 33i          | Erbscheinsvermutung _____                        | 3, 8, 13, 49          |
| Behauptungslast _____                               | 45           | Erbteilsquote _____                              | 16                    |
| Behörden _____                                      | 24a, 37      | Erteilung des Erbscheins _____                   | 1, 8, 30, 33g, 47, 49 |
| Beschränkungen _____                                | 17           | Europäisches Nachlasszeugnis _____               | 25, 32a, 33a, 53      |
| – Nacherbfolge _____                                | 17           | – Gültigkeitsfrist _____                         | 32f                   |
| – Testamentsvollstreckungsanordnung _____           | 17           | Fiktion _____                                    | 46                    |
| Beschwerden _____                                   | 17           | Finanzbehörden _____                             | 37                    |
| Besitz _____                                        | 11, 22, 49   | Fortsetzung der Gütergemeinschaft, Zeugnis _____ | 53                    |
| Betreuungs- bzw. Familiengericht _____              | 40           | Gegenbeweis, Beweis des Gegenteils _____         | 48                    |
| Beweisgrundlage _____                               | 6            | Größe des Nachlasses und des Erbteils _____      | 16, 20                |
| Beweiserleichterung _____                           | 5            | Grundbuchamt _____                               | 25 ff                 |
| Beweislast _____                                    | 45, 49       | Handelsregister _____                            | 36                    |
| Beweismittel _____                                  | 33g, 48      | Hauptbeweis _____                                | 48                    |
| DDR _____                                           | 53           | Identität des Inhabers _____                     | 48                    |
| Echtheit des Testaments _____                       | 31, 48       | Insolvenzgericht _____                           | 40                    |
| Eidesstattliche Versicherung _____                  | 33b          | Kraftloserklärung _____                          | 12                    |
| Einstweilige Anordnung _____                        | 11           | Kommanditist _____                               | 36                    |
| Einstweilige Verfügung _____                        | 11           | Kosten _____                                     | 35                    |
| Einziehung _____                                    | 12           |                                                  |                       |
| Erbprätendenten _____                               | 48a          |                                                  |                       |
| Erbprätendentenstreit _____                         | 33c, 48a, 49 |                                                  |                       |

|                                        |                      |                                           |               |
|----------------------------------------|----------------------|-------------------------------------------|---------------|
| Miterbe _____                          | 16, 32e, 33b, 34d ff | Testamentsvollstreckung _____             | 13, 32d, 33f  |
| Nacherbe _____                         | 14, 25a              | Testierfähigkeit _____                    | 33c           |
| Nachlassgericht _____                  | 40                   | Vermächtnis _____                         | 17, 20        |
| Nachlassinsolvenz _____                | 42                   | Vermutung _____                           | 14            |
| Nachlassverwaltung _____               | 17, 32d              | – Erbrecht _____                          | 14            |
| Öffentlicher Glaube _____              | 4                    | – Objektiver Bestand _____                | 15            |
| Öffentliche Urkunde _____              | 7                    | – Subjektive Berechtigung _____           | 15            |
| Parteirolle im Prozess _____           | 49 f                 | – Größe des Erbteils _____                | 16            |
| Post- und transmortale Vollmacht _____ | 34                   | – zugrundeliegende Tatsachen _____        | 20            |
| Prozessgericht _____                   | 33c, 44, 48          | Vermutung für und gegen alle _____        | 3, 14, 19, 48 |
| Rechtsvermutung _____                  | 2                    | Verwaltungsgericht _____                  | 39            |
| – Widerlegung _____                    | 2                    | Vorerbe _____                             | 14, 25a, 33e  |
| Restitutionsklage _____                | 13                   | Vormundschaftsgericht _____               | 40            |
| Scheidungsklausel _____                | 33d                  | Widerlegung der Erbscheinsvermutung _____ | 48            |
| Schiffsregister _____                  | 37                   | Widersprechende Erbscheine oder           |               |
| Tatsachenvermutung _____               | 13                   | Erbfolgezeugnisse _____                   | 23            |
| Teilungsanordnung _____                | 20, 32e              | – Erbschein _____                         | 24            |
| Testamentsvollstrecker _____           | 53                   | – Testamentsvollstreckerzeugnis _____     | 24            |
|                                        |                      | – deutscher Erbschein _____               | 24a           |
|                                        |                      | – Europäisches Nachlasszeugnis _____      | 24a           |
|                                        |                      | Zivilprozessgericht _____                 | 43            |

## I. Grundsätzliche Wirkungen des Erbscheins

An die Erteilung des Erbscheins knüpft das Gesetz in den §§ 2365 ff (ähnlich wie in 1 den §§ 891–893 an die Eintragung im Grundbuch) folgende rechtliche **Wirkungen**:

### 1. Rechtsvermutung

Der Erbschein begründet gem § 2365 eine **widerlegliche** (s Rn 48; BGHZ 41, 23, 29) 2 **Vermutung** hinsichtlich des Erbrechts des im Erbschein als Erben Bezeichneten sowie hinsichtlich des Mangels von nicht im Erbschein angegebenen Beschränkungen des Erben (ausf SCHULZ 95 ff; MUSCHELER, Erbrecht II Rn 3335 ff). Anders als in den Fällen der §§ 1006, 891 geht es bei § 2365 nicht um ein bestimmtes einzelnes Recht des Legitimierten, sondern potenziell um sämtliche Erbschaftsgegenstände einschließlich der Befreiung von einem zur Erbschaft gehörenden Recht (MEDICUS Jura 2001, 294, 298).

§ 2365 ist der für das Grundbuch geltenden Vermutungsregelung des § 891 nach- 3 gebildet und begründet wie diese eine Rechtsvermutung für die dort angeführten rechtlichen Umstände. Die Grundbuchvermutung des § 891 greift allerdings auch im Rechtsstreit, in dem das gebuchte Recht selbst den Streitgegenstand bildet, ein; eine bedeutsame Einschränkung gilt hier hingegen für die Erbscheinsvermutung (s unten Rn 49). Ist das Grundbuch nach dem Tod des Erblassers umgeschrieben worden, so geht § 891 dem § 2365 vor (BeckOK/SIEGMANN/HÖGER Rn 12).

## 2. Öffentlicher Glaube

- 4 Der Inhalt des Erbscheins gilt gem §§ 2366, 2367 für den rechtsgeschäftlichen Verkehr mit dem im Zeugnis als Erben Bezeichneten **zugunsten gutgläubiger Dritter** als richtig (zum Zweck des Erbscheins, auch den Rechtsverkehr mit dem Erben zu sichern, s KG RJA 12, 118; s ferner allgemein KUCHINKE Jura 1981, 281, 285; ausf SCHULZ 97 ff; zur Rechtsfolge bei einander **widersprechenden Erbscheinen** s Rn 23 ff und § 2366 Rn 35 f). Auch der Rechtsanwalt darf bis zur Kenntniserlangung von gegenteiligen Tatsachen von der Richtigkeit der Erbnachweise aufgrund von § 2365 ausgehen (KNODEL MDR 2006, 121, 123).

## 3. Grundlage für die §§ 2366 f

- 5 Die unter 1. erwähnte Vermutung der Richtigkeit begründet zwar zunächst eine besondere Beweiskraft, die von dem „öffentlichen Glauben“ des Erbscheins begrifflich zu trennen ist, aber doch die Grundlage für die Wirkungen der §§ 2366 f bildet: Der aus den §§ 2366, 2367 abzuleitende „öffentliche Glaube“ reicht **nur soweit, wie die Vermutung** des § 2365 reicht (MUSCHELER, Erbrecht II Rn 3338); dh dass § 2365 für sich genommen nur eine Beweiserleichterung für den Inhaber des Erbscheins gibt (ZIMMERMANN Rn 742); über § 2366 verschafft der Erbschein dem gutgläubigen Erwerber darüber hinaus vollwirksame Rechte, auch wenn der im Zeugnis Benannte nicht Erbe ist.

## 4. Beweisgrundlage

- 6 Der Beweis des Erbrechts kann auf andere Weise als durch einen Erbschein erbracht bzw zu erbringen versucht werden, wenn nichts anderes bestimmt ist (s etwa OLG Bremen OLGZ 1966, 171 sowie Einl 24 ff zu §§ 2353 ff). So besteht keine Vorschrift, wonach ein Dritter vom Erben als Legitimation die Vorlage eines Erbscheins verlangen und bis dahin zB an den Erben geschuldete Leistungen verweigern oder eine Kündigung des Erben zurückweisen könnte (vgl RGZ 54, 343; BGH NJW 2005, 2779; BeckOK/SIEGMANN/HÖGER Rn 1; MünchKomm/J MAYER § 2365 Rn 32 mwNw); § 94 ZPO ist zu beachten (s näher Einl 32 zu §§ 2353 ff).
- 7 Der Beweis wird durch die Vorlage eines Erbscheins allerdings erleichtert: Als **öffentliche Urkunde** iS des § 417 ZPO hat der Erbschein gem § 437 ZPO die Vermutung der Echtheit für sich (s näher Einl 22 ff zu §§ 2353 ff); es gilt § 292 ZPO (s noch unten Rn 48).

## II. Die Voraussetzungen der Erbscheinsvermutung

- 8 Die Voraussetzungen der Erbscheinsvermutung sind eine **wirksame Erteilung** des Erbscheins sowie die **Identität** des im Zeugnis Benannten mit dem, dessen Erbrecht geltend gemacht wird. Es kommt nicht darauf an, wer den Erbschein beantragt hat (MünchKomm/J MAYER § 2365 Rn 22).
- 9 Erst an die Erteilung (zum Begriff der „Erteilung“ eines Erbscheins s Rn 404 ff) knüpfen sich die im Gesetz vorgesehenen rechtlichen Wirkungen, da der Erbschein vor seiner Erteilung rechtlich nicht existiert. Da ohne jede Aushändigung eine Rechtswirkung des Erbscheins nicht in Frage kommt, ist auf die „**Aushändigung**“ des Zeugnisses

abzustellen. Kommt daher ein Zeugnis auf andere Weise als durch Aushändigung an den Antragsteller in den Verkehr, so treten die Wirkungen der §§ 2365–2367 nicht ein (s dazu KRAFT SeuffBl 64, 292 f).

Erforderlich und genügend ist ein, sei es auch von einem örtlich unzuständigen Gericht (vgl § 2 Abs 3 FamFG) oder unter Verletzung einer Vorschrift der §§ 2354–2360, **formell gültig** erteilter Erbschein (ZIMMERMANN Rn 743). **10**

Der **Besitz** des Erbscheins ist nicht erforderlich. Daher entfaltet auch ein im Wege einer **einstweiligen Anordnung** gem § 49 FamFG (s hierzu § 2361 Rn 93) oder **einstweiligen Verfügung** gem § 935 ZPO eingezogener Erbschein (s hierzu Erl zu § 2362) die Vermutung des § 2365 (BGHZ 40, 54, 59; BeckOK/SIEGMANN/HÖGER Rn 2). Auch die **Vorlage** oder **Bezugnahme** im Rechtsverkehr ist für die Vermutung nicht erforderlich; seine bloße Existenz reicht (FAKomm-ErbR/LEMKE Rn 2; NK-BGB/KROISS § 2365 Rn 1; HK-BGB/HOEREN Rn 5; **aA** PARODI AcP 1985, 362; s näher § 2366 Rn 5). **11**

Die **Vermutung endet** mit der **wirksamen Einziehung** oder **Kraftloserklärung** nach § 2361 bzw mit der Ablieferung nach § 2362 (MünchKomm/J MAYER § 2365 Rn 8; FAKomm-ErbR/LEMKE Rn 2). Die wirksame Einziehung setzt dabei die Rückgabe der Urschrift und sämtlicher Ausfertigungen voraus; die Kraftloserklärung wird einen Monat nach Bekanntmachung wirksam (s näher § 2361 Rn 42 ff, 47). **12**

### III. Die Tragweite der Erbscheinsvermutung

Die Vermutung des § 2365 ist eine **Rechtsvermutung**, keine Tatsachenvermutung (RG GRUCHOT 57, 1021; MünchKomm/J MAYER § 2365 Rn 6; SOERGEL/ZIMMERMANN Rn 1; LEIPOLD Rn 654; SCHILKEN, Zivilprozessrecht [5. Aufl 2006] Rn 471; KIPP/COING § 103 Fn 5; ROSENBERG, Die Beweislast § 16; MUSCHELER, Erbrecht II Rn 3340). Denn der Erbschein **bezeugt** das **Erbrecht**, insoweit also keine Tatsache. Er stellt somit auch keine Urkunde iS des § 580 Nr 7b ZPO dar, die eine **Restitutionsklage** stützen könnte (s näher Einl 21 zu §§ 2353 ff). Ebenso wenig liegt darin eine **Bezeugung von Tatsachen** iS des § 418 ZPO; dies gilt auch bei den durch §§ 352b Abs 1 und 2 FamFG vorgeschriebenen tatsächlichen Angaben von Testamentsvollstreckung und Vor- und Nacherbfolge (**aA** STAUDINGER/FIRSCHING<sup>12</sup> Rn 6). Wohl wird durch diese Angaben für die Rechtswirksamkeit der sich daraus ergebenden Beschränkungen die Vermutung des § 2365 begründet (zur beweisrechtlichen Bedeutung der nicht unter § 2365 fallenden Angaben im Erbschein s SCHOLZ 90 ff). **13**

Die Vermutung greift sowohl **zugunsten** als auch **zu Lasten** des Erbscheinserben (NK-BGB/KROISS § 2365 Rn 1; MUSCHELER, Erbrecht II Rn 3339). Der **Inhalt der Vermutung** ist ein doppelter:

#### 1. Vermutung des Erbrechts

Sie erstreckt sich zunächst positiv darauf, dass dem im Erbschein als Erben Bezeichneten das darin angegebene **Erbrecht zusteht** (MUSCHELER, Erbrecht II Rn 3335). Den **Berufungsgrund** umfasst die Vermutungswirkung *nicht* (BGB-RGRK/KREGEL Rn 4; ERMAN/SIMON Rn 4; MünchKomm/J MAYER § 2365 Rn 11; PALANDT/WEIDLICH Rn 1; SOERGEL/ZIMMERMANN Rn 1, Rn 3; BROX/WALKER Rn 616; HARDER/KROPPEBERG Rn 640; MUSCHELER, Erb- **14**

recht II Rn 3340; vLÜBTOW II 1021; aA PLANCK/GREIFF Anm 2a). Der einem Vorerben erteilte Erbschein begründet keine Vermutung für das Bestehen des Erbrechts der namentlich aufgeführten **Nacherben** (OLG München HRR 1938 Nr 315; ERMAN/SIMON Rn 4 mwNw; KÖSTER Rpfleger 2000, 90, 91) und ebenso wenig für das durch den Nichteintritt des Nacherbfalles bedingte **Fortbestehen** der Erbenstellung des Vorerben (BECKOK/SIEGMANN/HÖGER Rn 7; MünchKomm/J MAYER § 2365 Rn 12, § 2363 Rn 2; SOERGEL/ZIMMERMANN Rn 3; KÖSTER Rpfleger 2000, 133, 140; s Erl zu § 2353 Rn 479).

- 15 Die Vermutung umfasst den **objektiven Bestand** des Erbrechts und die **subjektive Berechtigung** des im Erbschein als Erben Bezeichneten. Vermutet wird nur das Zustehen des Erbrechts, nicht auch, dass der im Erbschein Bezeichnete über das Recht verfügen kann, dass er also geschäftsfähig und in der Verfügung über das Recht nicht beschränkt ist.
- 16 Bei mehreren Erben (vgl §§ 2353 u 352a FamFG) beinhaltet das „Erbrecht“ auch die **Größe des Erbteils** der einzelnen Erben in sich (MUSCHELER, Erbrecht II Rn 3335). Die hierüber im Erbschein gemachte Angabe bezeichnet „das Erbrecht“ der einzelnen Erben näher *seinem Umfang nach*, kennzeichnet also das Teilerbrecht der Miterben. Die Vermutung erstreckt sich demnach auch auf den im Erbschein angegebenen Umfang des Erbrechts, sofern er in einer *Erbteilsquote* ausgedrückt ist, *nicht* hingegen auf die *Zugehörigkeit von Gegenständen* zum Nachlass.

## 2. Keine weiteren Beschränkungen

- 17 Die Vermutung des § 2365 erstreckt sich weiter negativ darauf, dass der im Erbschein als Erbe bezeichnete **nicht durch andere als die angegebenen und anzugebenden Anordnungen beschränkt** ist (s nur MünchKomm/J MAYER § 2365 Rn 13; SOERGEL/ZIMMERMANN Rn 3; LANGE/KUCHINKE § 339 VII 2 b; MUSCHELER, Erbrecht II Rn 3335). Unter solchen Beschränkungen sind **nur** diejenigen der § 352b Abs 1 u 2 FamFG (**Nacherbfolge** und **Testamentsvollstreckungsanordnung**), *nicht* aber Beschränkungen irgendwelcher anderen Art, wie zB durch *Nachlassverwaltung oder -insolvenz* oder auch durch *Vermächtnisse* herbeigeführte Beschränkungen, zu verstehen, da andere Beschränkungen oder gar Beschwerden nicht in den Erbschein aufzunehmen sind (s etwa OLG Rostock OLGE 26, 276; vgl auch KG OLGE 12, 399; NK-BGB/KROISS § 2365 Rn 8; MünchKomm/J MAYER § 2365 Rn 14; MEDICUS Jura 2001, 294, 295, allgM).
- 18 Mangels Angabe der Nacherbschaft im Erbschein wird also vermutet, dass der Erbe nicht durch Nacherbschaft in irgendeinem Grade beschränkt wird (KG OLGE 44, 107 Fn 1a); mangels Angabe eines Testamentsvollstreckervermerks wird vermutet, dass der Erbe nicht durch die §§ 2205 ff in irgendeiner Weise beschränkt ist. Enthält der Erbschein, der eine ausschließlich nach deutschem Recht zu beurteilende Erbfolge richtig bezeugt, den Zusatz „des in der *Bundesrepublik Deutschland* befindlichen Vermögens“, so handelt es sich dabei seit Inkrafttreten des FGG-Reformgesetzes vom 1. 9. 2009 um eine zulässige Beschränkung iS des § 352c Abs 1 FamFG; ein solcher Zusatz nimmt an den Wirkungen der §§ 2365 ff teil (WEITHASE Rpfleger 1985, 267 mwNw, auch zur Gegenansicht; BayObLG Rpfleger 1990, 74).

### 3. Keine Vermutung für das Bestehen der angegebenen Beschränkungen

Nach zT vertretener Auffassung soll sich die Vermutung des § 2365 auch darauf **19**  
erstrecken, dass die im Erbschein gemäß § 352 Abs 1 u 2 FamFG angegebenen  
Beschränkungen des Erbrechts des im Erbschein als Erben Bezeichneten wirklich  
bestehen (so STAUDINGER/FIRSCHING<sup>12</sup> Rn 11 auch BGB-RGRK/KREGEL Rn 6; WEISSLER I 343;  
BARTHOLOMEYCZIK 270; KLAER 6; KRAFFT 272; WEINER 53; **aA** zu Recht OLG Frankfurt NJW 1957,  
265; WM 1993, 803, 805; BayObLG JFG 6, 135; NK-BGB/KROISS § 2365 Rn 4; BeckOK/SIEGMANN/  
HÖGER Rn 6; ERMAN/SIMON Rn 3; MünchKomm/J MAYER § 2365 Rn 15; PALANDT/WEIDLICH Rn 1;  
SOERGEL/ZIMMERMANN Rn 3 Fn 19; BROX/WALKER Rn 616; LANGE/KUCHINKE § 39 VII 3 c mwNw;  
KIPP/COING § 103 I; PLANCK/GREIFF Anm 2b; MEDICUS Jura 2001, 294, 295; eingehend MUSCHE-  
LER, Erbrecht II Rn 3342). Die Negativvermutung (Rn 17 ff) bedingt jedoch nach Wort-  
wahl und Zweck der Vorschrift keine positive Kehrseite; ein Bedürfnis für die mit  
der Rechtsvermutung verbundene Beweislastumkehr (vgl BREHM Rn 556), besteht  
insoweit nicht.

Der Erbschein bezeugt also lediglich das Erbrecht des Erben mit der Maßgabe, dass  
keine anderen als die angegebenen Beschränkungen vorliegen, nicht hingegen ein  
nur beschränktes Erbrecht.

### 4. Keine Erstreckung der Vermutung auf die dem Erbrecht zugrunde liegenden Tatsachen

Auf die dem Erbrecht zugrunde liegenden Tatsachen, zB die Echtheit des Testa- **20**  
ments (RG Gruchot 57, 1021) oder andere Rechtsverhältnisse, erstreckt sich die Ver-  
mutung nicht. So beweist der Erbschein auch nicht die Richtigkeit der Unterlagen,  
die das Gericht zur Überzeugung von der Richtigkeit des Erbrechts führten (KG  
OLGE 42, 145 Fn 1 a). Insbesondere fallen auch nicht darunter die in einen Erbschein  
nicht aufzunehmenden (nur schuldrechtlich sich auswirkenden) Angaben wie zB  
über **Vermächtnisse, Auflagen und Teilungsanordnungen**, über die Zugehörigkeit  
gewisser **Grundstücke, Gesellschaftsanteile** (BayObLG DB 1998, 126, 127) oder anderer  
Vermögensstücke zum Nachlasse, den **Bestand** und die **Größe** des Nachlasses über-  
haupt, über die Person des ernannten Testamentsvollstreckers und dergl mehr (KG  
OLGE 12, 399). Namentlich bezeugt der Erbschein also nicht den dem ausgewiesenen  
Erbrecht unterfallenden Nachlass (OLG Hamm NJW 1968, 1682; KG OLGZ 1967, 358;  
NK-BGB/KROISS § 2365 Rn 7; BeckOK/SIEGMANN/HÖGER Rn 7; Hk-BGB/HOEREN Rn 7; Münch-  
Komm/J MAYER § 2365 Rn 19; SOERGEL/ZIMMERMANN Rn 3).

Der Erbschein begründet auch keine Vermutung dafür, dass der **Erblasser Eigentü- 21**  
**mer** der zur Erbschaft tatsächlich gehörenden Sachen gewesen ist. Hier können  
jedoch die allgemeinen Regeln der §§ 891, 1006 mit den entsprechenden Gutglau-  
bensfolgebestimmungen eingreifen (vgl BREHM Rn 558 mwNw; MEDICUS Jura 2001, 294;  
s auch STROHAL § 68 Nr I 3).

Gemäß § 857 geht der **Besitz** auf den Erben über. Spricht die Vermutung des § 2365 **22**  
für das Erbrecht des Erbscheinserben, so folgt daraus zugleich die Vermutung, dass  
der Besitz des Erblassers auf den Erbscheinserben übergegangen ist. Der Besitz des  
Erbscheins begründet hingegen umgekehrt keine Vermutung dafür, dass der Besit-  
zer des Erbscheins der darin als Erbe Bezeichnete ist. Auch wird der Erbscheins-



besitzer nicht automatisch zum **Erbschaftsbesitzer** iS des § 2018; denn hierfür ist ua Voraussetzung, dass faktisch etwas aus der Erbschaft erlangt wurde (MünchKomm/J Mayer § 2365 Rn 6).

## 5. Einander widersprechende Erbscheine oder Erbfolgezeugnisse

### a) Einander widersprechende Erbscheine

- 23** Im Hinblick auf §§ 2 Abs 3, 343 FamFG und die Möglichkeit der Erteilung eines neuen Erbscheins vor der Einziehung oder Kraftloserklärung des alten (s § 2361 Rn 6) lässt sich die Erteilung mehrerer einander widersprechender Erbscheine nicht ausschließen. Auch bei Nichtbeachtung der §§ 3 bis 5 FamFG kann es hierzu kommen. In einem solchen Fall kann die Rechtsvermutung des § 2365 für die Dauer des Nebeneinanderbestehens nicht greifen (BGHZ 33, 314 = LM Nr 1 zu § 2366 mAnm v PIEPENBROCK; BGHZ 58, 105, 108; BGHZ 103, 108 = NJW 1972, 582; BGH FamRZ 1990, 1111, betr Testamentsvollstreckerzeugnis; NK-BGB/KROISS § 2365 Rn 5; BeckOK/SIEGMANN/HÖGER Rn 8; ERMAN/SIMON Rn 1, § 2366 Rn 5; Hk-BGB/HOEREN Rn 8; MünchKomm/J Mayer § 2365 Rn 4; PALANDT/WEIDLICH § 2366 Rn 3; SOERGEL/ZIMMERMANN Rn 2; BROX/WALKER Rn 617; EBENROTH Rn 1063; KIPP/COING § 103 III; vLÜBTOW II 1021; **aA** und differenzierend LANGE/KUCHINKE § 39 II 5 c Fn 96; HERMINGHAUSEN NJW 1986, 571; KLEIN Rpfleger 1984, 389; LINDACHER DNotZ 1970, 93; PARODI AcP 1985, 362, 372 f; WEISS Rpfleger 1984, 389, 390; s ferner noch § 2366 Rn 34 ff zum folgerichtigen Wegfall der Gutgläubenswirkung in diesem Fall). Denn im Wortlaut von § 2353 heißt es zweimal „*in dem Erbschein*“ (MUSCHELER, Erbrecht II Rn 3336). Bei solchen einander **widersprechenden Erbscheinen iSd § 2353** entfällt die Vermutung des § 2365 aber nur in dem Umfang, in dem sich die Zeugnisse inhaltlich widersprechen (BGH FamRZ 1990, 1111); bei inhaltlicher Übereinstimmung trägt jeder Erbschein die Vermutung des § 2365 (MünchKomm/J Mayer § 2365 Rn 4).

### b) Erbschein und Testamentsvollstreckerzeugnis, die einander widersprechen

- 24** Auch wenn sich ein **Erbschein** und ein **Testamentsvollstreckerzeugnis** iS des § 2368 iVm § 354 Abs 2 FamFG inhaltlich widersprechen – zB weil der Erbschein anders als das Testamentsvollstreckerzeugnis keinen Testamentsvollstreckervermerk enthält – entfallen die Vermutungen nach § 2365 (BGHZ 58, 105, 107; BGH NJW-RR 1990, 1159; FAKomm-ErbR/LEMKE Rn 2; MünchKomm/J Mayer § 2365 Rn 4; MUSCHELER, Erbrecht II Rn 3338).

### c) Erbschein und Europäisches Nachlasszeugnis, die einander widersprechen

- 24a** Aufgrund der Tatsache, dass neben dem **deutschen** oder ausländischen autonomen **Erbschein** ein **Europäisches Nachlasszeugnis** ausgestellt werden kann, entfällt nicht das Rechtsschutzbedürfnis für ein zusätzliches Zeugnis (PALANDT/WEIDLICH Anh zu §§ 2353 ff, Art 68 EU-ErbVO Rn 10; s Einl 123 ff zu §§ 2353 ff). Der deutsche Gesetzgeber dürfte mit Nr 12210 Abs 2 KV GNotKG der Ansicht, dass neben einem Europäischen Nachlasszeugnis *kein* nationaler Erbschein ausgestellt werden darf (s hierzu BERGQUIST ua/REINHARTZ, EU-Erbrechtsverordnung Kommentar Art 62 Rn 7), eine Absage erteilt haben. Es besteht daher die Gefahr der Ausstellung von **divergierenden Zeugnissen**, die sich inhaltlich widersprechen (s FÖTSCHL ERPL 2010, 1262; BERGQUIST ua/REINHARTZ, EU-Erbrechtsverordnung Kommentar Art 62 Rn 6 ff).

- 24b** Die gilt vor allem, wenn diese in unterschiedlichen Mitgliedstaaten ausgestellt werden. So kann etwa in Deutschland ein Welterbschein nach den §§ 2353 ff BGB, § 343

Abs 1 FamFG ausgestellt werden (§ Einl 76 ff zu §§ 2353 ff), weil das deutsche Nachlassgericht der Ansicht ist, der Erblasser habe seinen letzten gewöhnlichen Aufenthalt in Deutschland gehabt, während in einem anderen Land ein europäisches Nachlasszeugnis ausgestellt wird, weil man dort davon ausging, der Erblasser habe dort seinen letzten gewöhnlichen Aufenthalt gehabt. In diesem Fall würden die Gerichte wegen des grds Gleichlaufes von Zuständigkeit und Erbstatut (Art 4–Art 21 EU-ErbVO) idR auch ein divergierendes Erbstatut zugrunde legen.

Zu divergierenden Entscheidungen kann es auch dann kommen, wenn das Erbrecht von selbständig anzuknüpfenden Vorfragen wie der Ehe, der Adoption oÄ abhängen (DÖRNER ZEV 2012, 505, 512; dieser schließt daraus, dass Vorfragen unselbständig anzuknüpfen seien; zur Selbstständigen Anknüpfung von Vorfragen, s Einl 121 zu §§ 2353 ff).

Zu widersprechenden Zeugnissen könnte auch § 1371 führen: Der **pauschalisierte Zugewinnausgleich** ist nach dem BGH als rein güterrechtlich zu qualifizieren (BGH ZEV 2015, 409 = ErbR 2015, 433). Das könnte dazu führen, dass die Erhöhung des Ehegattenerbrechts um ein Viertel im Europäischen Nachlasszeugnis anders als im Deutschen Erbrecht nicht bei der Bestimmung der Erbquoten berücksichtigt wird und das Europäische Zeugnis die erbrechtliche Lage folglich unzutreffend wiedergibt (s hierzu DUTTA IPRax 2015, 32, 33). Erwägungsgrund Nr 12 S 1 der EU-ErbVO nimmt allerdings Fragen des ehelichen Güterrechts nur insoweit vom Anwendungsbereich der Verordnung aus, als diese keine erbrechtlichen Fragen regeln. S 2 stellt gar klar: Die Behörden, die mit einer bestimmten Erbsache nach dieser Verordnung befasst sind, sollten allerdings je nach den Umständen des Einzelfalls die Beendigung des ehelichen oder sonstigen Güterstands des Erblassers bei der Bestimmung des Nachlasses und der jeweiligen Anteile der Berechtigten berücksichtigen. Dies sollte die Ausstellungsbehörde zum Anlass nehmen, die Erbquoten in einem Europäischen Nachlasszeugnis auch insoweit wiederzugeben, als sie auf dem Güterrecht beruhen (DUTTA IPRax 2015, 32, 33; SÜSS ZEuP 2013, 725; KUNZ GPR 2012, 253, 254); dies allein führt zur Abbildung richtiger Erbquoten. Eine andere Frage ist, ob der erhöhte Erbteil dann an der Vermutungswirkung des Europäischen Nachlasszeugnisses teilhat, was aber wohl trotz Erwägungsgrund 71 S 2 zu bejahen ist (so auch BeckOGK/J SCHMIDT Art 69 EU-ErbVO Rn 14; aA BERGQUIST ua/REINHARTZ, EU-ErbVO Kommentar Art 69 Rn 6; MANKOWSKI ZEV 2014, 121, 126), weil der Rechtsverkehr aus dem Wortlaut des Erbscheins heraus kaum in der Lage sein wird, zu differenzieren und alles andere dem Sinn und Zweck des Zeugnisses, ein einheitliches Legitimationspapier für ganz Europa zur Verfügung zu stellen, widersprechen würde und das Güterrecht in Erwägungsgrund 71 S 3 nicht genannt ist. Sinn der Ausnahme des Güterrechts ist allein, dass im Hinblick hierauf kein Gutglaubensschutz entfaltet werden soll. In Bezug auf einen güterrechtlich motivierten Erbteil hingegen schon.

Zum Teil wird vertreten, dass die Zeugnisse *uneingeschränkt nebeneinander* Bestand haben sollen und der Gutglaubensschutz sich bei einem jeden nach seinen Regeln richtet (RECHBERGER ÖJZ 2012, 17). Zum Teil wird auch vertreten, dass das *Europäische Zeugnis Vorrang* vor dem nationalen haben soll (FÖTSCHL ERPL 2010, 1262). Andere sind der Ansicht, dass in solchen Fällen die *Gutglaubenswirkung der divergierenden Zeugnisse entfalle* (BUSCHBAUM/SIMON ZEV 2012, 525, 528; DORSEL ZErB 2014, 212, 222; MünchKomm/DUTTA Art 62 EU-ErbVO Rn 16; kritisch daher zum ungeklärten Verhältnis zwischen nationalem und europäischem Zeugnis LANGE DNotZ 2012, 168, 174 f). Für den deutschen

Erbschein würde das der Rechtslage bei divergierenden deutschen Zeugnissen (§ oben Rn 23) entsprechen. Dies mag im ersten Moment dafür sprechen, dieser Ansicht zu folgen, weil das Europäische Nachlasszeugnis und der deutsche Erbschein im deutschen Recht als gleichwertig anzusehen sind (Einl 124 zu §§ 2353 ff).

**24f** Richtigerweise wird die Frage für den **deutschen Erbschein** nur aufgrund des deutschen Rechts beantwortet werden, weil nach Art 62 Abs 3 S 1 EU-ErbVO das Europäische Nachlasszeugnis nicht an die Stelle der innerstaatlichen Zeugnisse tritt; es steht gleichwertig daneben. Das Europäische Recht lässt dabei die nationalen Regeln über Erbfolgezeugnisse unberührt. Der Ansicht, die für einen Vorrang des Europäischen Nachlasszeugnisses gegenüber dem deutschen Erbschein plädiert, ist daher eine Absage zu erteilen (so auch MünchKomm/DUTTA Art 62 EU-ErbVO Rn 16). Die Frage, ob ein deutscher Erbschein seinen öffentlichen Glauben verliert, richtet sich nach rein nationalem Recht. Nach § 2365 ff gewährt der deutsche Erbschein abstrakten Gutglaubensschutz (§ 2366 Rn 5), allein aufgrund der Tatsache, dass er existiert. Dies kann bei divergierenden deutschen Erbscheinen nicht gelten (§ 2365 Rn 23), weil man nicht entscheiden kann, auf welches Dokument sich der gute Glaube stützen sollte. Wenn aber nur ein deutscher Erbschein vorliegt, dem ein Europäisches Nachlasszeugnis (zT) inhaltlich widerspricht, so stellt sich die Rechtslage anders dar: Das Europäische Nachlasszeugnis entfaltet anders als der deutsche Erbschein keinen abstrakten, sondern nur konkreten Vertrauensschutz (hierauf weist OMLOR ErbR 2015, 286 = GPR 2014, 216 zu Recht hin; s auch BeckOGK/J SCHMIDT Art 69 EU-ErbVO Rn 29 ff, 44; ähnlich PALANDT/WEIDLICH Anh zu §§ 2353 ff Art 69 EU-ErbVO Rn 2 und DORSEL ZErB 2014, 212, 222). Allenfalls dann, wenn es konkret vorgelegt wird, mag es den guten Glauben an den deutschen Erbschein vernichten. Dies aber richtet sich ebenfalls nach nationalem Recht: Erforderlich ist nach § 2366 positive Kenntnis von der Unrichtigkeit (§ 2366 Rn 10), was wohl allein aufgrund der Vorlage eines Europäischen Zeugnisses nicht der Fall sein dürfte. Das nationale Nachlassgericht muss die Einziehung von Amts wegen nach § 2361 prüfen, wenn es von einem divergierenden Europäischen Nachlasszeugnis erfährt. Hält es an der Richtigkeit des nationalen Zeugnisses fest, so behält dies seine Legitimationswirkung. Ist dem nicht so, so muss es die Rückgabe verlangen, was den guten Glauben entfallen lässt (§ 2366 Rn 14).

**24g** Für das **Europäische Nachlasszeugnis** ist die Frage verordnungsautonom zu beantworten. Mit dem europäischen Recht dürfte es kaum vereinbar sein, dem Europäischen Zeugnis seine Wirkung in Art 69 EU-ErbVO festgelegten Vermutungswirkungen zu nehmen, weil ein Mitgliedstaat ein inhaltlich divergierendes Legitimationspapier ausstellt (so wohl auch PALANDT/WEIDLICH Anh zu §§ 2353 ff Art 69 EU-ErbVO Rn 2). Dies gilt wegen Art 62 Abs 3 S 2 EU-ErbVO sowohl im Ausland als auch im Inland. Der gute Glaube wird aber hier – anders als im deutschen Recht – schon durch grobe Fahrlässigkeit zerstört (BeckOGK/J SCHMIDT Art 69 EU-ErbVO Rn 32). Diese mag bei konkreter Vorlage eines divergierenden nationalen Erbfolgezeugnisses im Einzelfall gegeben sein. Erfährt die Ausstellungsbehörde vom divergierenden nationalen Zeugnis, muss es prüfen, ob das Europäische Zeugnis zu ändern oder zu widerrufen ist (Art 71 Abs 2 EU-ErbVO) oder jedenfalls seine Wirkungen nach Art 73 EU-ErbVO auszusetzen sind (MünchKomm/DUTTA Art 62 EU-ErbVO Rn 17).

#### IV. Erbscheinsverwendung in verschiedenen Kontexten

##### 1. Erbschein und Grundbuchamt

###### a) § 35 Abs 1 S 1 GBO

Nach § 35 Abs 1 S 1 GBO ist ein **Erbschein** das idR erforderliche und ausreichende **25**  
Mittel des Nachweises der Erbfolge im Grundbuchverfahren. Seit 17. 8. 2015 steht  
dem Erbschein das **Europäische Nachlasszeugnis** gleich (in Umsetzung von Art 69  
Abs 5, Art 63 Abs 2a EU-ErbVO, vgl BT Drucks 18/4201, 58, s hierzu noch Rn 32a ff).

So kann nach dem Tod des Vorerben die Eigentümereintragung auf den Nacherben **25a**  
berichtigt werden, wenn sich die Nacherbfolge im Weg der dinglichen Surrogation  
an einem Grundstück(-santeil) fortsetzt, das der Vorerbe im Weg der Erbausein-  
andersetzung aus dem Nachlass erworben hat, wenn ein die *Nacherbschaft* bekun-  
dender Erbschein vorgelegt wird (OLG Hamm ZEV 2003, 31; OLG München ZEV 2014,  
328). Dies gilt auch, wenn der Nacherbe vorverstorben ist, der bezeichnete Nach-  
erbfall dadurch eingetreten ist und ausgewiesener Erbe des Nacherben der Vorerbe  
ist; denn weder der dem Vorerben ausgestellte und den Nacherben sowie den  
Nacherbfall bezeichnende Erbschein noch der im Grundbuch eingetragene Nach-  
erbenvermerk ist ausreichend, um die Nacherbfolge zu belegen (OLG München ZEV  
2011, 587). Dabei ist es zulässig, einen Antrag auf Grundbuchberichtigung aufgrund  
Erbfolge mit der Bedingung zu verknüpfen, dass kein Nacherbenvermerk eingetra-  
gen wird (OLG Hamm ZEV 2011, 589 = ZErB 2011, 250; keine Eintragung eines Nacherbenver-  
merks bei Erbschein ohne Ausweis einer Vor- und Nacherbfolge, OLG München ZEV 2012, 671  
[LS] = ZErB 2012, 134).

Vorzulegen ist die **Unterschrift** oder eine **Ausfertigung** (BÖHRINGER ZEV 2001, 387); mit **25b**  
Rücksicht auf die Bestimmung des § 2361 genügt die Vorlage einer **beglaubigten**  
**Abschrift** des Erbscheins an das Grundbuchamt nicht den Erfordernissen des § 35  
Abs 1 S 1 GBO (s OLG Rostock OLGE 3, 390; BGH NJW 1982, 170; hiernach genügt ein  
Verweis auf den sich in den Nachlassakten befindlichen Erbschein, wenn Grundbuchamt und Nach-  
lassgericht demselben Amtsgericht angehören).

**aa)** Unstreitig ist dabei allerdings, dass das Grundbuchamt vorweg die sachliche **26**  
Zuständigkeit der das Zeugnis ausstellenden Behörde sowie die äußere Ordnungs-  
mäßigkeit der vorgelegten Urkunde (zB die Eigenschaft eines Erbscheins: KG OLGE 18,  
214; den zulässigen und verständlichen Inhalt: BayObLGZ 14, 558; LG Berlin NJW 1933, 641  
[ENDEMANN]; KGJ 34 A 227; KG OLGE 21, 346; s DEMHARTER § 35 GBO Rn 25) zu prüfen  
hat.

**bb)** Die Frage, inwieweit das **Grundbuchamt** beim Vorliegen eines Erbscheins die **27**  
**Erbfolge nachprüfen** darf oder muss, ist in Rechtsprechung und Schrifttum in Einzel-  
heiten umstritten (s DEMHARTER § 35 GBO Rn 26 ff; ERMAN/SIMON Rn 5; MünchKomm/  
J MAYER § 2365 Rn 26 f; PALANDT/WEIDLICH § 2353 Rn 24; SOERGEL/ZIMMERMANN § 2353 Rn 57;  
DREWES DNotV 26, 453; ENDEMANN III § 146 Nr V b; BÖHRINGER Rpfleger 2003, 166, 167 f;  
HAEGELE Rpfleger 1951, 547; 1956, 229; WEISSLER I 355). Es haben sich folgende Ansätze  
entwickelt:

**(1)** Solange eine *Einziehung oder Kraftloserklärung* des Erbscheins gem § 2361 **28**

*nicht erfolgt* ist, darf und muss das Grundbuchamt im Allgemeinen auf die Richtigkeit des Erbscheins und den Fortbestand der gesetzlichen Vermutung *vertrauen*. Es hat grundsätzlich nicht in eine eigene Nachprüfung der Richtigkeit des Erbscheins einzutreten (KG JFG 18, 42; JW 1938, 2408; OLG Celle NdsRpfl 1958, 140; BayObLG MittBay-Not 1970, 161; FamRZ 1990, 669; 1997, 710 mwNw; NK-BGB/KROISS § 2365 Rn 10; BGB-RGRK/KREGEL Rn 8; DEMHARTER § 35 GBO Rn 26; ERMAN/SIMON Rn 6; MünchKomm/J MAYER § 2365 Rn 26; PALANDT/WEIDLICH § 2353 Rn 24; SOERGEL/ZIMMERMANN § 2353 Rn 57; zum DDR-Staats-erbrecht DÖRINGER DtZ 1996, 130; aA KIPP/COING § 103 I; JOSEF ZZP 35, 555; 47, 276; GUETHE/TRIEBEL § 35 GBO<sup>6</sup> Rn 17, 57; s auch SCHWARZE GRUCHOT 57, 308 ff).

- 29 (2) Insbesondere ist das Grundbuchamt nach ständiger Rechtsprechung an die *Beurteilung der Formgültigkeit* (KGJ 37 A 253; KG JFG 18, 42) sowie an die *Auslegung* einer Verfügung von Todes wegen (KG OLGE 9, 333; 11, 256; KGJ 34, 228; 42, A 222; OLG München JFG 16, 148; KG 18, 44; OLG Celle NdsRpfl 1958, 140), wie sie das Nachlassgericht vorgenommen hat, *gebunden*. Eine abweichende Beurteilung ist mit den Bedürfnissen des Verkehrs unvereinbar. Zudem kann das Grundbuchamt annehmen, das Nachlassgericht sei kraft seiner Befugnis zu Ermittlungen und Beweiserhebungen auf diesem in Grundbuchsachen nicht gangbaren Wege zu seiner Entscheidung gelangt (dagegen namentlich SCHWARZE Gruchot 57, 308 ff).
- 30 (3) Das Grundbuchamt hat einen Erbschein jedoch dann zu *beanstanden*, wenn ihm *neue*, vom Nachlassgericht bei Erteilung des Erbscheins offenbar nicht berücksichtigte *Tatsachen* bekannt geworden sind, die eine (sachliche) Unrichtigkeit des Erbscheins in irgendeinem Punkte erweisen und von denen das Grundbuchamt ohne Weiteres annehmen muss, dass das Nachlassgericht deshalb den Erbschein nicht aufrechterhalten, sondern einziehen oder für kraftlos erklären wird (KGJ 45 A 252; KG JFG 1, 366; 18, 42; OLG München 16, 328; OLG München RNtZ 2012, 286; BayObLG FamRZ 1990, 669 f; NK-BGB/KROISS § 2365 Rn 10; BeckOK/SIEGMANN/HÖGER Rn 12; DEMHARTER § 35 GBO Rn 26; ERMAN/SIMON Rn 5; MünchKomm/J MAYER § 2365 Rn 27; PALANDT/WEIDLICH § 2353 Rn 24; SOERGEL/ZIMMERMANN § 2353 Rn 57; COHN 8; DREWES 453; ENDEMANN III § 146 Nr V b; KIPP/COING § 103 I; WEISSLER I 355; BARTHOLOMEYCZIK 284; BUSCHMANN BIGBW 1965, 169, 170; HAEGELE Rpfleger 1951, 547; 1956, 229). Die Vermutung des § 2365 ist für den Grundbuchverkehr in diesem Fall zunächst entkräftet. Das Grundbuchamt kann die Vorlage eines neuen Erbscheins verlangen und beim Nachlassgericht die Einziehung des alten anregen; das Nachlassgericht wird dieser Anregung idR nachgehen müssen. Verbleibt das Nachlassgericht allerdings auf seinem alten Standpunkt, so ist das Grundbuchamt an die Rechtsauffassung des Nachlassgerichts gebunden; es greift dann wieder der Grundsatz, dass das Nachlassgericht im Verhältnis zum Grundbuchamt allein die Verantwortung für die Richtigkeit eines noch im Rechtsverkehr befindlichen Erbscheins trägt (s auch KG Rpfleger 1977, 307; BGHZ 117, 287, 301; MünchKomm/J MAYER § 2365 Rn 27 mwNw).
- 31 Es ist der oben genannten herrschenden Auffassung zuzustimmen, dass Tatsachen, aus denen die Unrichtigkeit des Erbscheines hergeleitet wird, nur mit der oben (Rn 30) angeführten Einschränkung zu berücksichtigen sind. Das Erbscheinszeugnis beruht immer auf der Rechtsauffassung des Nachlassgerichts, die wiederum an die (sei es nun richtige oder unrichtige) eigenverantwortliche Feststellung und Bewertung von Tatsachen (zB Echtheit des Testaments) anknüpft, die nicht anders – nämlich als letztlich nach § 35 GBO verbindlich – behandelt werden darf als eine

Testamentsauslegung (abw OLG Frankfurt Rpfleger 1953, 36 m zust Anm KESSLER). Letztlich gilt die gesetzliche Vermutung des § 2365 somit auch im Rahmen des § 35 GBO.

Der bloße *Antrag auf Einziehung gem § 2361* entzieht dem Erbschein seine gesetzliche Bedeutung für das Grundbuchamt noch nicht (KG OLGE 40, 156 Fn 1). Steht die Unrichtigkeit jedoch derart zweifelsfrei fest, dass seine Einziehung sicher zu erwarten ist, so bindet der Erbschein das Grundbuchamt nicht (KGJ 45, 252; JFG 18, 42). **32**

ZT muss das Grundbuchamt zusätzliche Voraussetzungen prüfen, wie etwa den Eintritt einer Bedingung bei auflösend bedingter Erbeinsetzung (OLG Köln ZEV 2010, 97). Die Vorlage eines Erbscheins zur Grundbuchberichtigung kann aber nicht bei rein abstrakter Möglichkeit eines Rücktritts vom Erbvertrag verlangt werden (OLG Saarbrücken ErbR 2015, 696).

**cc)** Bei Vorlage eines **Europäischen Nachlasszeugnisses** wird gem Art 69 Abs 2 EU-ErbVO dessen Richtigkeit und Vollständigkeit vermutet (SCHMIDT ZEV 2014, 389, 393; LANGE DNotZ 2016, 103, 110 ff). **32a**

**(1)** Daher ist das deutsche Grundbuchamt *weder berechtigt noch verpflichtet*, seine Richtigkeit zu überprüfen (WILSCH ZEV 2012, 530). Es kann auch zB bei der Löschung von beim Tod erlöschender Rechte wie einem Wohnrecht nicht zusätzlich einen weiteren Todesnachweis, wie zB in Spanien üblich, verlangen (WILSCH ZEV 2012, 530, 531). **32b**

Zum Teil wird vertreten, dass dies nur dann gelte, wenn das Europäische Nachlasszeugnis im Ausstellungsstaat von einem Amtsträger in Form einer öffentlichen Urkunde und in einem dem deutschen Erbscheinsverfahren gleichwertigen Verfahren erstellt worden ist. Als Begründung wird Art 69 Abs 5 EU-ErbVO angeführt, der einen Vorbehalt für das nationale Registerrecht und damit auch das Grundbuchrecht sowie das materielle Sachenrecht enthält (HERTEL DNotZ 2012, 688). Nach Art 3 Abs 1i und Art 1 Abs 2l EU-ErbVO könnten Europäische Nachlasszeugnisse, die nicht als Urkunden in Erscheinung treten, weil sie nicht von öffentlichen Stellen erteilt wurden, nicht als Europäisches Nachlasszeugnis fungieren (so zB zT in den skandinavischen Ländern); diese müssten nach § 29 GBO zurückgewiesen werden (LEHMANN ZEV 2012, 533, 534). Das Europäische Nachlasszeugnis sei keineswegs per se eine öffentliche Urkunde, sondern nach Art 69 Abs 5 EU-ErbVO nur ein „*wirk-sames Schriftstück*“. Eine öffentliche Urkunde müsse gemäß der Rechtsprechung des EuGH (EuGH v 17. 6. 1999, C-260/97, Slg 1999 I-03715, DNotZ 1999, 919 Rn 21) die Mindestanforderungen nach Rs „Unibank“ erfüllen. Hierzu gehöre insbesondere die Errichtung durch eine Behörde oder eine staatliche hierzu ermächtigte Stelle sowie die Erstreckung der Beweiskraft sowohl auf die Unterschrift als auch den Inhalt der öffentlichen Urkunde. Daher hänge es von der Ausgestaltung des Errichtungsverfahrens im jeweiligen Mitgliedstaat ab, ob es sich bei dem Zeugnis um eine öffentliche Urkunde iSd Art 3 Abs 1i EU-ErbVO handle oder nicht. Aufgrund der Bereichsausnahme der Art 1 Abs 2l, 69 Abs 5 EU-ErbVO müsse den mitgliedstaatlichen Registervorschriften vollständig Rechnung getragen werden (BUSCHBAUM/SIMON ZEV 2012, 525, 529). Dies scheint mir nach Änderung des § 35 GBO zum 17. 8. 2015 nicht mehr vertretbar, da der deutsche Gesetzgeber (wohl **32c**

im Übrigen verordnungsgemäß) das Europäische Nachlasszeugnis einem deutschen Erbschein generell gleichgestellt hat. Daher steht das Europäische Nachlasszeugnis dem deutschen Erbschein iRd Grundbuchordnung generell gleich (so auch HERTEL ZEV 2013, 539).

**32d (2)** Die Vermutungswirkung des Europäischen Nachlasszeugnisses gilt allerdings nur für den **Nachweis der Rechtsstellung der Erben** bzw auf den Nachweis der Testamentsvollstreckung oder Nachlassverwaltung.

**32e** Zwar kann das Europäische Nachlasszeugnis gem Art 63 Abs 2b EU-ErbVO auch als Nachweis für die Zuweisung bestimmter Vermögenswerte des Nachlasses an die in dem Zeugnis als Erben oder Vermächtnisnehmer genannten Personen dienen. Diese *dinglich wirkenden Teilungsanordnungen* oder *Vindikationslegate* (vgl Art 68 EU-ErbVO) sind dem deutschen Recht jedoch fremd; sie werden daher (nach ganz hM) in schuldrechtlich wirkende Teilungserklärungen oder Damnationslegate umgedeutet (Art 31 EU-ErbVO), die dinglich vollzogen werden müssen (BT-Drucks 18/4201, 58; KUNZ GPR 2012, 253, 255 und dieselbe rechtspolitisch kritisch in GPR 2013, 293; DÖBEREINER GPR 2014, 42, 43; aA GÄRTNER S 212, die die dingliche Wirkung auch nach deutschem Recht anerkennen will, weil sie sie als erbrechtlich qualifiziert; auch DUTTA FamRZ 2013, 412 und MARGONSKI GPR 2013, 106 sowie SCHMIDT RabelsZ 77 [2013] 1, gewähren Art 23 Abs 2 lit e EU-ErbVO Vorrang, so dass sich der Rechtsübergang bei Vermächtnissen nach dem Erbstatut richtet). Soweit das jeweilige Belegenheitsrecht für Grundstücke einen besonderen Übertragungsakt erfordert, gilt dies als materielles Grundstücksrecht und Grundbuchverfahrensrecht der *lex rei sitae* (vgl Erwägungsgrund 18 EU-ErbVO); denn die EU-ErbVO regelt ausdrücklich nicht die Eintragung in einem Grundbuch oder ähnlichen Registern sowie deren Eintragungsvoraussetzungen (Art 1 Abs 2l EU-ErbVO) sowie nicht die „*Art der dinglichen Rechte*“ (Art 1 Abs 2k EU-ErbVO). Aufgrund solcher Inhalte des Europäischen Nachlasszeugnisses können daher keine Umschreibungen im Grundbuch vorgenommen werden; dies erfolgt vielmehr erst, nachdem die dingliche Übereignung unter Vorlage der diesbezüglichen Unterlagen vollzogen ist. Auch wenn ein Vermächtnisnehmer in einem Europäischen Nachlasszeugnis ausdrücklich ausgewiesen ist, muss daher das deutsche Grundbuchamt für die Umschreibung auf den Vermächtnisnehmer weiterhin die Vorlage einer Auflassung durch die Erben an den Vermächtnisnehmer verlangen. Das Gleiche gilt bei einer Erbauseinandersetzung unter Miterben (HERTEL DNotZ 2012, 688; SIMON/BUSCHBAUM NJW 2012, 2393, 2397; WILSCH ZEV 2012, 530).

**32f (3)** Das Grundbuchamt muss prüfen, ob die **Gültigkeitsfrist** des Europäischen Nachlasszeugnisses zum Zeitpunkt des Eintragungsantrages noch nicht abgelaufen ist (LANGE DNotZ 2016, 103, 112). Wird ein Ablauf fälschlicherweise nicht bemerkt und dennoch eingetragen, so kommt ein Amtswiderspruch nach § 53 Abs 1 S 1 GBO aber nur in Betracht, wenn hierdurch das Grundbuch materiell unrichtig ist (WILSCH ZEV 2012, 530, 532). Hieraus leitet sich auch weder eine Pflicht noch ein Recht des Grundbuchamtes ab, ständig neue gültige Europäische Nachlasszeugnisse anzufordern. Dies folgt schon aus dem grundbuchrechtlichen Beibringungsgrundsatz und aus der Vermutungswirkung des § 891 Abs 1 (LEHMANN ZEV 2012, 53, 534). Die ausländische Ausstellungsbehörde muss nicht nach § 55 GBO zwingend über die Eintragung benachrichtigt werden. Dies kann aber sinnvoll sein in der Hoffnung, über eine etwaige Aussetzung der Wirkungen des Zeugnisses informiert zu werden (LEH-

MANN ZEV 2012, 533, 534). WILSCH will gar das Grundbuchamt verpflichten, Rücksprache mit den Nachlassgerichten zu halten und das europäische justizielle Netz zu aktivieren (WILSCH ZEV 2012, 530, 532).

**b) § 35 Abs 1 S 2 GBO**

Nach § 35 Abs 1 S 2 GBO genügt es für den Nachweis der Erbfolge aufgrund einer **öffentlich beurkundeten Verfügung von Todes wegen**, wenn an Stelle des Erbscheins die Verfügung und die **Niederschrift über ihre Eröffnung** vorgelegt werden (OLG Zweibrücken ZErB 2011, 224; zum Nachweis der Erbfolge auf Erbgeschenken bei unterschiedlicher Schreibweise des Nachnamens von Erbe und Erblasser in den vorgelegten Erbscheinen KG ZErB 2012, 43). Es ist dann Aufgabe des Grundbuchamtes, die ihm vorgelegten Urkunden und die aus den beizuziehenden Nachlassakten ersichtlichen Umstände als Nachweis zu würdigen (OLG Hamm NJW-RR 1997, 1095, 1096; dabei hat es grds auch einen Erbvertrag auszulegen OLG Hamm ErbR 2014, 38 = ZErB 2013, 265). So kann es genügen, wenn im notariellen Ehe- und Erbvertrag „die gemeinschaftlichen Kinder“ als Erben eingesetzt waren, dass gegenüber dem Grundbuchamt anstelle eines Erbscheins in der Regel auch eine Nachweisführung durch Personenstandsurkunden (§§ 55 ff PStG) und Versicherung an Eides statt dazu in Betracht kam, dass nur ein gemeinschaftliches Kind vorhanden ist (OLG München ZEV 2013, 45 = ZErB 2012, 82).

Danach steht es nicht im Belieben des Grundbuchamtes, trotz der vorliegenden, dem § 35 Abs 1 S 2 GBO entsprechenden Urkunden noch einen **Erbschein** oder ein **Europäisches Nachlasszeugnis zu fordern** (BayObLGZ 1970, 137; 1974, 1; BayObLG Rpfleger 1983, 104; FamRZ 2001, 43, 44; KG OLGE 40, 48; 44, 88; JFG 11, 195; 13, 123; 18, 332; 20, 217; JW 1938, 1411; OLG München OLGE 22, 185; OLG Hamm DNotZ 1972, 96; MittBayNot 2000, 457 m krit Anm WELSKOP; OLG Frankfurt Rpfleger 1998, 513; OLG SchlH MDR 2000, 458; LG Aachen Rpfleger 1984, 231 [MEYER-STOLTE]; LG Frankfurt Rpfleger 1984, 271 [GRUNSKY]; LG Neuruppin MittBayNot 2004, 46; DEMHARTER § 35 GBO Rn 39 ff mwNw). Das Verlangen ist nur dann gerechtfertigt, wenn sich *bei Prüfung* des Testaments nach Form und Inhalt und unter Beachtung der gesetzlichen Auslegungsregeln *wirkliche Zweifel an dem behaupteten Erbrecht ergeben* (vgl § 35 Abs 1 S 2 letzter HS GBO), die auf einer bestimmten tatsächlichen Unterlage beruhen und *nur durch weitere Ermittlungen über den Willen des Erblassers oder über die tatsächlichen Verhältnisse geklärt werden können* (OLG Naumburg ErbR 2014, 38; OLG Hamm ErbR 2014, 38 = ZErB 2013, 265; OLG Frankfurt ErbR 2014, 38; BayObLGZ 1974, 1, 4; BayObLG Rpfleger 2000, 266; OLG Stuttgart OLGE 1975, 147; OLG Hamm ZEV 2000, 456; 2001, 403; OLG Köln Rpfleger 2000, 157; s auch BOKELMANN Rpfleger 1971, 337; BÖHRINGER BWNNotZ 1988, 155 und Rpfleger 2003, 166, 167 sowie ausführlich ZEV 2001, 387 ff mwNw; zum Nachweis der Nacherbfolge s OLG Frankfurt Rpfleger 1974, 18). Die Zwischenverfügung, nach der ein Erbschein verlangt wird, ist aber nicht selbständig beschwerdefähig; vielmehr muss gegen die Endentscheidung Beschwerde eingelegt werden (OLG Hamm ZEV 2015, 491 [LS] = ErbR 2015, 583 [LS] = ZErB 2015, 279).

Es gibt im Einzelfall auch die Möglichkeit eines Nachweises der Erbenstellung durch **eidesstattliche Versicherung** (hierzu BÖHRINGER ZEV 2001, 387, 388 f mwNw). Ist die Verwirkung des Erbrechts von Pflichtteilsberechtigten ausdrücklich nur an die Geltendmachung des Pflichtteils geknüpft, so kann zum Nachweis des Nichteintritts der auflösenden Bedingung der Pflichtteilsstrafklausel im Grundbuchverfahren ohne den Umweg über das Nachlassgericht auch die Abgabe eidesstattlicher Versiche-



rungen in öffentlicher Urkunde vor dem Notar zugelassen werden, weil auch das Nachlassgericht weitere Ermittlungen insoweit nicht anstellen würde (OLG Frankfurt ErbR 2014, 38; OLG Hamm ErbR 2011, 252; OLG München NotBZ 2013, 152). Anders das OLG Hamm (ZEV 2014, 507): Der Nachweis einer testamentarischen Erbfolge, die durch das Pflichtteilsverlangen eines Miterben bedingt ist, kann gegenüber dem Grundbuchamt nicht durch die notarielle Urkunde und ggf ergänzende Vorlage von Belegen oder eine eidesstattliche Versicherung über das Pflichtteilsverlangen, sondern nur durch einen Erbschein geführt werden. Bei dem zur Grundbuchberichtigung erforderlichen Nachweis der Erbfolge durch öffentliche Urkunde hat das Grundbuchamt im Regelfall deren Wirksamkeit und damit die Negativtatsache der Nichtaufhebung zu unterstellen. Eine eidesstattliche Versicherung des Inhalts, dass ein Rücktritt (hier: vom Erbvertrag) nicht erfolgt sei, kann das Grundbuchamt nicht verlangen (OLG Düsseldorf ErbR 2014, 38).

- 33c** Hat das Grundbuchamt tatsächliche Zweifel an der **Testierfähigkeit** des Erblassers und damit an der Wirksamkeit der Erbeinsetzung in einer letztwilligen Verfügung, kann es trotz Vorliegens einer notariell beurkundeten letztwilligen Verfügung die Vorlage eines Erbscheins zur Grundbuchberichtigung verlangen (OLG Hamm ErbR 2015, 93 = ZEV 2015, 64). Hat das Grundbuchamt Anhaltspunkte für die Testierunfähigkeit eines Erblassers im Zeitpunkt der notariellen Beurkundung einer letztwilligen Verfügung, kann dennoch zum Nachweis der Erbfolge die Vorlage der Verfügung und die Niederschrift über deren Eröffnung genügen, wenn das Prozessgericht in einem zwischen den einzig in Betracht kommenden Erbprätendenten geführten Rechtsstreit rechtskräftig das Erbrecht desjenigen festgestellt hat, der in der letztwilligen Verfügung als Erbe bestimmt worden ist; die Feststellungen können auch in einem *Anerkenntnisurteil* getroffen worden sein (KG ZEV 2015, 64 = ErbR 2015, 148 = ZErB 2015, 58). Haben mehrere sachverständige Befunde, die im zeitlichen Zusammenhang mit der Errichtung der letztwilligen Verfügung erstellt worden sind, als Ergebnis, dass die Geschäfts- bzw Testierfähigkeit zu bejahen ist, jedenfalls aber nicht zweifelsfrei verneint werden kann, ist für die Erbfolge von der Testierfähigkeit auszugehen; das Grundbuchamt kann nicht mit der Begründung, es sei nicht zweifelsfrei nachgewiesen, dass der Erblasser testierfähig gewesen sei, einen Erbschein verlangen (OLG München ZEV 2014, 689 = ErbR 2015, 95). Ein Gutachten zur Testierunfähigkeit kann im Beschwerdeverfahren keine nachträgliche Berücksichtigung finden (OLG Düsseldorf ErbR 2015, 146).
- 33d** Es kann keine Zweifel an dem behaupteten Erbrecht rechtfertigen, die das Grundbuch berechtigen würde, einen Erbschein zu verlangen, wenn ein Ehegattentestament eine **Scheidungsklausel** enthält, die sich an die Voraussetzungen des § 2077 Abs 1 BGB anlehnt (KG ZEV 2013, 620).
- 33e** § 35 Abs 1 S 2 GBO greift nicht ein, wenn jemand in einem notariellen Testament als alleiniger, nicht befreiter Vorerbe eingesetzt und in einem späteren eigenhändigen Testament, in dem das notarielle Testament ausdrücklich für unwirksam erklärt wird, dann als Alleinerbe eingesetzt wird. In diesem Fall beruht sein Erbrecht nicht iS des § 35 GBO auf dem notariellen Testament (BayObLG Rpfleger 1993, 324). Daher ist die Vorlage eines Erbscheins erforderlich.
- 33f** *Weicht die Auslegung des Grundbuchamts* in Bezug auf ein vom Antragsteller vor-

gelegtes gemeinschaftliches Testament vom Eintragungsantrag *ab*, so hat das Grundbuchamt zum Nachweis der Erbfolge die Vorlegung eines Erbscheins zu verlangen (OLG Düsseldorf ZEV 2012, 671 [LS]). Gleiches gilt, wenn die Rechtsstellung der Kinder der in einem Erbvertrag verfügenden Ehegatten als diejenige von „Nacherben“ beschrieben wird. Dann kann das Grundbuchamt eine davon abweichende Auslegung, die den überlebenden Ehegatten als Vollerben und die Kinder nur als Schluss-erben des Letztversterbenden ansieht, nicht vornehmen, da eine solche Auslegung nur nach weiteren tatsächlichen Ermittlungen möglich ist, die aber dem Nachlassgericht vorbehalten sind (OLG Hamm ZErB 2013, 265 = ErbR 2014, 38). Auch wenn ein notarielles Testament hinsichtlich der Anordnung einer Testamentsvollstreckung geändert wird, kann die Erbfolge nur durch einen Erbschein nachgewiesen werden (OLG Hamm ZEV 2013, 511 = ZErB 2013, 102). Haben Ehegatten einen notariellen Ehe- und Erbvertrag wegen einer beabsichtigten Scheidung durch notarielle Vereinbarung wieder aufgehoben, so bedarf es jedenfalls dann der Vorlage eines Erbscheins, wenn die Unwirksamkeit des Aufhebungsvertrags zweifelhaft bleibt und wegen behaupteten Aufgebens des Scheidungsbegehrens Ermittlungen tatsächlicher Art, etwa zur Frage des Wegfalls der Geschäftsgrundlage, erforderlich sind (OLG München ZEV 2013, 620). Auch wenn ein durch Zeugnis ausgewiesener Testamentsvollstrecker einen Grundbuchberichtigungsantrag stellt, ist zum Nachweis der Erbfolge ein Erbschein vorzulegen (OLG München ZEV 2011, 590; OLG Köln Rpfleger 1992, 342). Ein für Handelsregisterzwecke erteilter Erbschein ist für Zwecke des Grundbuchs in seinem Nachweiswert nicht geschmälert (OLG München ZEV 2011, 590).

Ausnw kann sich das Grundbuchamt zur Eintragung eines (Mit-)Eigentümers mit anderen, nicht der Form des § 29 GBO entsprechenden Beweismitteln begnügen, wenn das Grundstück oder dessen Anteil **weniger als 3.000 € Wert** hat und die Beschaffung des Erbscheins nur mit unverhältnismäßigem Aufwand an Kosten oder Mühe möglich ist (§ 35 Abs 3 S 1 GBO). Die Anwendbarkeit der Ausnahmевorschrift setzt nicht nur die Einhaltung der Wertgrenze für das betreffende Grundstück oder dessen Anteil voraus, sondern verlangt darüber hinaus, dass die Beschaffung eines Erbscheins nur mit unverhältnismäßigem Aufwand an Kosten oder Mühe oder beidem möglich ist (OLG Jena ErbR 2015, 697). Bei einem Wert des in den Nachlass fallenden Miteigentumsanteils von 850 € und Kosten für die Erteilung des Erbscheins von 250 € (Verhältnis beider Werte weniger als 1/3) liegt nach OLG München (ZEV 2014, 387 = ErbR 2014, 501) keine Unverhältnismäßigkeit vor. **33g**

Im Falle des § 82a S 2 GBO kann das Grundbuchamt das Nachlassgericht um die Ermittlung des maßgeblichen Erbrechts ersuchen (KG Rpfleger 1977, 307). **33h**

Zur Bedeutung **ausländischer Erbschaftszeugnisse** s Einl 96 ff zu §§ 2353 ff. Zum Erbnachweis für Vermögensrechte mit Grundstücksbezug in den **neuen Bundesländern** s BÖHRINGER Rpfleger 1999, 110. **33i**

#### **c) Erbschein erforderlich bei post- oder transmortaler Vollmacht?**

Eine post- oder transmortale Vollmacht über den Tod (im Zweifel wird vermutet, dass die Vollmacht transmortal ist, §§ 672, S 1, 675 Abs 1, 168 S 1 BGB; s auch WEIDLICH ZEV 2016, 57 und ZIMMER ZEV 2014, 617; beide zu Recht kritisch gegen OLG München ZEV 2014, 615) hinaus ersetzt die Vorlage eines Erbscheins zur Grundbuchberichtigung des Eigentumsübergangs auf den Erben *nicht* (LG Heidelberg NJW 1973, 1088). **34**

Auch eine scheinbar rechtsgeschäftliche Übertragung vom Erben auf sich selbst durch Vorlage der Vollmacht ist als „verkappte Grundbuchberichtigung“ abzulehnen (OLG Schleswig ZEV 2015, 225 = ErbR 2016, 86 mAnm WENDT in ErbR 2016, 74); in diesem Fall ist ein Erbschein oder ein anderer Nachweis nach § 35 GBO vorzulegen.

- 34a** Aber: Der grundbuchrechtliche Vollzug eines Rechtsgeschäftes, das ein Bevollmächtigter aufgrund einer (wirksamen) trans- oder postmortal wirkenden Vollmacht des verstorbenen eingetragenen Berechtigten vornimmt, ist nicht von einem Erbnachweis nach § 35 GBO abhängig (OLG München ErbR 2014, 537; s auch OLG München ErbR 2015, 459 = DStR 2015, 12; WEIDLICH ZEV 2016, 57, 59) und sowohl vor als auch nach Umschreibung des Grundbuches auf die Erben noch möglich (OLG Frankfurt ZEV 2014, 202), da der Bevollmächtigte die (auch unbekannten) Erben aufgrund Vollmachtserteilung des Erblassers (wenn auch nicht ausdrücklich, s LG Stuttgart ZEV 2008, 198) vertritt (WEIDLICH ZEV 2016, 57, 59), was § 20 GBO genügt. Denn die Erben sind durch die trans- oder postmortale Vollmacht gebunden, solange die Vollmacht nicht – für das Grundbuchamt ersichtlich (OLG Frankfurt ZEV 2014, 202) – widerrufen ist (OLG Hamm ZEV 2013, 341; OLG Frankfurt DNotZ 2012, 140; OLG München ZEV 2012, 376; DEMHARTER § 35 GBO Rn 9). Etwas anderes würde nur dann gelten, wenn eine Vereintragung des oder der Erben erforderlich wäre, was aber im Falle der Übertragung oder Aufhebung eines zum Nachlass gehörenden Rechtes durch die Erben des eingetragenen Berechtigten nach § 40 GBO nicht der Fall ist (OLG Schleswig ZEV 2015, 225 = ErbR 2016, 86 mAnm WENDT in ErbR 2016, 74; anders ist dies dann, wenn für den Erwerber ein Finanzierungsgrundpfandrecht eingetragen werden muss; dann bedarf es nach hM der vorherigen Grundbuchberichtigung auf den Erben und folglich der Vorlage eines Erbscheins, s RUPP notar 2015, 20; s hierzu auch WENDT ErbR 2016, 74, 77 f).
- 34b** Nach Ansicht des OLG Hamm (ZEV 2013, 341 = ErbR 2013, 1879) erlischt die Vollmacht des Alleinerben allerdings im Todeszeitpunkt durch Konfusion; der Erbe könne sich nicht selbst vertreten, da die Vollmacht eine Personenverschiedenheit von Vertreter und vertretener Person voraussetze (BESTELMEYER notar 2013, 143). Die Entscheidung des OLG Hamm (ZEV 2013, 341 = ErbR 2013, 1879) ist zu Recht viel kritisiert worden (KEIM DNotZ 2013, 692; MENSCH BWNNotZ 2013, 91; DUTTA FamRZ 2013, 1513; LANGE ZEV 2013, 343; aA auch LG Bremen Rpfleger 2013, 1513 [MEYER-STOLTE]; BeckOK/WILSCH § 35 GBO Rn 69; PALANDT/ELLENBERGER § 168 BGB Rn 4). Im Rechtsverkehr wird die Legitimationswirkung der Vollmacht gerade benötigt und eingesetzt, um eine Handlungsunfähigkeit „des Nachlasses“ in der Zeit zwischen Erbfall und Erbscheinserteilung zu vermeiden. Auch besteht materiell-rechtlich kein Bedürfnis für die Ansicht des OLG Hamm; denn entweder ist der Bevollmächtigte Alleinerbe und als solches berechtigt oder er ist berechtigt, aufgrund der Vollmacht zu handeln (RUPP notar 2015, 20; WENDT ErbR 2016, 74, 76; WEIDLICH ZEV 2016, 57, 63). Außerdem erlöschen schuldrechtliche Beziehungen zwischen Erblasser und Erben nicht stets oder gar zwingend. Der mit überschießender Rechtsmacht ausgestattete Alleinerbe büßt die Legitimationswirkung seiner Generalvollmacht gerade nicht ein. Das Grundbuchamt darf auch in diesem Fall keinen Erbschein verlangen (so zu Recht WENDT ErbR 2016, 74, 77 und WEIDLICH ZEV 2016, 57, 63; AMANN MittBayNotZ 2013, 367, 371; KEIM DNotZ 2013, 692, 694 f; ZIMMER ZEV 2013, 307, 312; LANGE ZEV 2013, 343; aA BESTELMEYER RPFleger 2014, 651, 656; 2015, 11 ff).
- 34c** Wer im Eingang der dem Grundbuchamt vorgelegten Urkunde erklärt, Alleinerbe

des Erblassers zu sein, läuft gleichwohl nach der Entscheidung des OLG Hamm in der Praxis gleichwohl Gefahr, dass das Grundbuchamt von ihm einen Erbnachweis nach § 35 GBO verlangt. Daher ist der Praxis anzuraten, entweder aufgrund der Erbenstellung zu handeln, zB wenn eine öffentliche Verfügung von Todes wegen (RUPP notar 2015, 20), oder ausschließlich aufgrund der Vollmacht, zB indem nur eine auszugsweise Ausfertigung des Vertrages beigelegt wird, ohne die Vorbemerkung mit den Sachverhaltsdarstellungen über die eingetretene Erbfolge (RUPP notar 2015, 20; und LANGE ZEV 2013, 343).

Das Erlöschen der Vollmacht durch Konfusion gilt jedenfalls dann nicht, wenn der Bevollmächtigte nur Miterbe ist (OLG Hamm ZEV 2013, 341 = ErbR 2013, 1879; OLG Schleswig ZEV 2015, 225 = ErbR 2016, 86 mAnm WENDT in ErbR 2016, 74 und mAnm RUPP notar 2015, 20; aA BESTELMEYER notar 2015, 147, 161); denn in diesem Fall handelt der Bevollmächtigte nicht für sich selbst, sondern für die Miterben in ihrer gesamthänderischen Verbundenheit. Ferner besteht in diesem Fall nicht die Gefahr, dass der Bevollmächtigte die Vollmacht nur für eine verkappte Grundbuchberichtigung nutzt; denn die Übertragung auf alle Miterben in Bruchteilseigentum kann nur durch rechtsgeschäftliche Übertragung erfolgen (Schleswig ZEV 2015, 225 mit Verweis auf BGH NJW 1956, 1433; OLG München ZEV 2012, 415). **34d**

#### **d) Kosten der Grundbuchberichtigung**

Für die Grundbuchberichtigung des Eigentums nach Erbfolge fällt gem **Nr 14110** **35** **Nr 1 KV GNotKG** grds eine *volle 1,0-Gebühr* an; eine Privilegierung naher Familienangehöriger wie in § 60 Abs 2 KostO ist nicht mehr vorgesehen (BT-Drucks 17/11471, 315). Nach **Abs 1 S 1 Anm zu Nr 14110 KV GNotKG** wird aber wie schon unter Geltung von § 60 Abs 4 KostO die Gebühr dann nicht erhoben, wenn der Eintragsantrag *innerhalb von zwei Jahren nach dem Erbfall* beim Grundbuchamt eingereicht wird (WILSCH ZEV 2013, 428; BT-Drucks 17/11471, 316). Dies gilt auch bei Eintragung eines Miterben infolge Abschichtung (OLG Zweibrücken ZEV 2012, 416; generell zum Erbschein bei Abschichtung OLG Brandenburg ZEV 2013, 614 und zur Grundbuchberichtigung infolge Abschichtung OLG Zweibrücken ZEV 2012, 264) und wenn zusammen mit der Eigentumsumschreibung die Eintragung einer Verfügungsbeschränkung in Gestalt eines Nacherbenvermerks eingetragen wird (OLG Frankfurt ZEV 2012, 555). Die Gebührenbefreiung nach Abs 1 S 1 Anm zu Nr 14110 KV GNotKG gilt nur, soweit der Miterbe direkt und ohne vorhergehende Eintragung der Erbengemeinschaft eingetragen wird (OLG Köln ZErB 2014, 200).

## **2. Erbschein und Handelsregister**

§ 12 **Abs 1 S 3 HGB** enthält für Anmeldungen zur Eintragung im Handelsregister **36** eine dem § 35 Abs 1 S 1 GBO vergleichbare Regelung: Danach haben Rechtsnachfolger eines Beteiligten die Rechtsnachfolge soweit tunlich durch öffentliche Urkunden nachzuweisen. Als solche kommen in erster Linie *Erbscheine* (s OLG Hamburg NJW 1966, 986; KG NJW-RR 1999, 863, 864; 2000, 1704; 2003, 255; KRUG ZEV 2001, 51), ein *Europäisches Nachlasszeugnis* (PALANDT/WEIDLICH Anh zu §§ 2353 ff Art 69 EU-ErbVO Rn 1), aber auch *in öffentlicher Urkunde enthaltene Verfügungen von Todes wegen* **analog § 35 Abs 1 S 2 GBO** in Betracht (s auch Einl 26 ff zu §§ 2353 ff; s auch WITTWER ÖAnwBl 2015, 87, 91). Bei Anmeldungen, die der Rechtsnachfolger eines im Handelsregister Eingetragenen vornimmt, ist der Nachweis dieser Rechtsnachfolge durch

öffentliche Urkunden in elektronischer Gestalt (§ 371a Abs 2 ZPO) zu erbringen (OLG Stuttgart ZEV 2012, 338). IÜ gelten die zu § 35 GBO dargestellten Grundsätze hier entsprechend: Das Registergericht kann den Erbfolgenachweis durch eine notariell beurkundete Verfügung von Todes wegen zusammen mit der Niederschrift über deren Eröffnung in Anlehnung an § 35 Abs 1 GBO als ausreichend ansehen, sofern die Verfügung von Todes wegen keine unlösbaren Auslegungsschwierigkeiten bereitet, sich also die Erbfolge aus dieser mit hinreichender Deutlichkeit ergibt. Bei verbleibenden Zweifeln oder in tatsächlicher Hinsicht erforderlichen Ermittlungen ist ein Erbschein anzufordern. Voraussetzung hierfür ist jedoch, dass nach erschöpfender rechtlicher Würdigung konkrete Zweifel bleiben, die nur durch weitere Ermittlungen geklärt werden können (OLG Stuttgart ZEV 2012, 338).

Zum Nachweis der Rechtsnachfolge nach einem verstorbenen **Kommanditisten** ist für die Anmeldung zum Handelsregister bei gesetzlicher Erbfolge hingegen idR die Vorlage eines Erbscheins erforderlich (OLG Hamm Rpfleger 1986, 139). Für die nach §§ 107, 143 Abs 2, 161 Abs 2 HGB erforderliche Anmeldung und Eintragung des Eintritts des Kommanditisten in die bestehende Gesellschaft ist die Rechtsnachfolge der früheren Kommanditbeteiligung einer Kommanditistin nach § 12 Abs 1 S 4 HGB soweit tunlich durch öffentliche Urkunden nachzuweisen; denn anders als in Grundbuchsachen (§ 35 Abs 1 GBO) liegt es hier im pflichtgemäßen Ermessen des Registergerichts, welche öffentliche Urkunden es für den Nachweis erfordert: Während bei gesetzlicher Erbfolge wie auch bei privatschriftlichen Testamenten grds die Vorlage eines Erbscheins erforderlich ist, genügt eine öffentlich beurkundete Verfügung von Todes wegen mit Eröffnungsprotokoll, wenn keine Anhaltspunkt dafür vorliegen, dass zur Feststellung der Erbfolge tatsächliche Ermittlungen erforderlich sind. Das Registergericht ist aber nicht verpflichtet, sich selbst ein Urteil über die Erbfolge zu bilden, sofern diese zweifelhaft ist; denn dies fällt in den Kompetenzbereich des Nachlassgerichts. Die durch eine Pflichtteilsstrafklausel begründeten Zweifel können dadurch ausgeräumt werden, indem eine eidesstattliche Versicherung vorgelegt wird, wonach der Pflichtteil nicht verlangt wurde. Dies stellt eine öffentliche Urkunde iSd § 12 Abs 1 S 4 HGB dar, die in Verbindung mit der notariellen letztwilligen Verfügung und der Niederschrift über deren Eröffnung zum Nachweis der Rechtsnachfolge geeignet ist (OLG Bremen ErbR 2014, 406).

### 3. Anwendbarkeit der Vermutung gegenüber Behörden, insbesondere Finanzbehörden

- 37 Der Erbschein stellt gem § 2365 auch gegenüber sonstigen Behörden wie insbesondere den Finanzbehörden eine Vermutung auf (BFHE 179, 436; BStBl II 1996, 242; HK-BGB/HOEREN Rn 1; MünchKomm/J MAYER § 2365 Rn 30; FAKomm-ErbR/LEMKE Rn 7; **aA** noch STAUDINGER/SCHILKEN [2004] Rn 14; HARTMANN UVR 1996, 267; RÖSSLER DSz 1996, 575; WEFERS NJW 1996, 2119). Der Inhalt des Erbscheins für die Erbschaftssteueransprüche des Fiskus ist aber nicht ohne Weiteres allein maßgebend und geeignet, dessen nach der wahren Rechtslage begründeten Ansprüche abschließend zu beseitigen (RG RJA 15, 14). Die **Steuerbehörden** und auch die **Finanzgerichte** dürfen zwar nur bei Vorliegen besonderer Umstände von der Vermutung des § 2365 abweichen (BFH DWW 1963, 29; ZEV 1996, 198 [BARFUSS] = NJW 1996, 2119 [WEFERS]; NdsFG StE 2004, 424; NK-BGB/KROISS 2365 Rn 11; BeckOK/SIEGMANN/HÖGER Rn 12; SOERGEL/ZIMMERMANN § 2353 Rn 57 mwNw; und auch STAUDINGER/SCHILKEN [2004] Rn 14; s auch THEYSON-WADLE ZEV 2002, 21; SOMMER/

KERSCHBAUER ZEV 2004, 13, 18). Erlangen die Finanzbehörden aber von Umständen Kenntnis, die für die offenbare Unrichtigkeit des Erbscheins sprechen, so müssen sie den Sachverhalt eigenständig aufklären (§ 88 AO; §§ 76 Abs 1, 107 FGO); dabei sind sie nicht an die Auffassung des Nachlassgerichts gebunden (BFH NJW 2005, 2218; BFH NotBZ 2005, 160; FAKomm-ErbR/LEMKE Rn 7). Hier liegt der Unterschied gegenüber § 35 GBO. Die Vermutung des § 2365 kann aber auch hier nur durch neue Tatsachen und nicht schon durch eine andere Auslegung entkräftet werden (MünchKomm/J. MAYER § 2365 Fn 8 mwNw zu dieser hM).

Zu beachten sind jedoch hinsichtlich des Anwendungsbereichs der Vermutung nach § 2365 die Sonderbestimmungen des § 35 GBO und des § 41 **Schiffsregisterordnung**, ferner uU auch die §§ **727, 792, 896 ZPO**. 38

#### 4. Erbschein und Verwaltungsgericht und andere Gerichtsbarkeiten

§ 2365 gilt auch im Verwaltungsgerichtsprozess: Das Verwaltungsgericht darf und muss solange vom Inhalt des Erbscheins ausgehen, wie der Erbschein nicht eingezogen ist (BVerwG ZOV 2006, 177; BVerwG VIZ 2001, 367; zust. SOERGEL/ZIMMERMANN Rn 1). 39

Das Gleiche gilt für Verfahren in anderen Gerichtsbarkeiten.

#### 5. Erbschein und Betreuungs- bzw Familiengericht/Nachlassgericht/Insolvenzgericht

a) Keine Bindung an den Erbschein besteht für das **Betreuungs- bzw Familiengericht** (so für das Vormundschaftsgericht KG JW 1937, 2042; BayObLG NJW-RR 2002, 1518; SOERGEL/ZIMMERMANN § 2353 Rn 24; das Vormundschaftsgericht wurde durch Art 50 des FGG-Reformgesetzes v 17. 12. 2008 mit Wirkung zum 1. 9. 2009 durch das Familien- bzw Betreuungsgericht ersetzt [BGBl I 2586]). 40

b) Eine Bindung besteht hingegen für das **Nachlassgericht**. Dies gilt sogar bei Entscheidung über die Aufhebung einer Nachlasspflegschaft für den unbekannten Erben (§ 1960 Abs 1) nach Erteilung eines Erbscheines bzw Ablehnung eines Einziehungsantrages (BayObLG FamRZ 2003, 561, 562). IRd Einziehungsverfahrens nach § 2361 gilt § 2365 nicht (BeckOK/SIEGMANN/HÖGER Rn 13). 41

c) Im Nachlassinsolvenzverfahren ist die Antragsberechtigung des Erben dem **Insolvenzgericht** durch Vorlage eines Erbscheins nachzuweisen (LG Köln NZI 2003, 501). Auch dieses ist hieran grds gebunden. 42

#### 6. Erbschein und Zivilprozessgericht

Die Rechtsvermutung des § 2365 wirkt sich insbesondere entsprechend § 292 ZPO im Zivilprozess mit Dritten aus (s. Einl 19 ff, 22 zu §§ 2353 ff): 43

##### a) Reichweite der Vermutung

Das Prozessgericht ist aber an die Entscheidung des Nachlassgerichts nicht gebunden; die Rechtsvermutung des § 2365 stellt vielmehr nur eine **gesetzliche Beweislastregel** dar (s. etwa BGHZ 47, 58, 66; BFH ZEV aaO; OLG Bremen WM 1962, 1200; OLG 44

§ 2365

Frankfurt OLGZ 1972, 120, 121; NK-BGB/KROISS Rn 1, Rn 12; BeckOK/SIEGMANN/HÖGER Rn 9 f; SOERGEL/ZIMMERMANN § 2353 Rn 24, § 2365 Rn 2; LANGE/KUCHINKE § 39 VII 2; vLÜBTOW II 1020). Keineswegs darf es im Übrigen umgekehrt einen Kläger darauf verweisen, seine erbrechtlich begründete Aktivlegitimation mittels eines Erbscheins nachzuweisen (unrichtig daher AG Charlottenburg WuM 2003, 86).

- 45** § 2365 trifft eine Regelung der **Beweislast**, nicht hingegen der Behauptungslast. Der von der Vermutung begünstigte Inhaber des Erbscheins hat vielmehr das Bestehen des von ihm geltend gemachten Erbrechts als Rechtsbehauptung vorzutragen (s ROSENBERG, Die Beweislast § 16 I 3), dabei auch den Berufungsgrund anzugeben, auf den er sich stützt (vLÜBTOW II 1021), und im Streitfall den Vermutungstatbestand zu beweisen, damit die Vermutungsfolge eintritt und dadurch der Beweis des vermuteten Umstands ersetzt wird. Jedenfalls im Verhältnis zwischen Dritten und dem (vermuteten) Erben steht dann also das Erbrecht oder das Fehlen von Beschränkungen fest (s dazu KLAER 10 ff; SCHOLZ 77 ff; insoweit zutr AG Charlottenburg WuM 2003, 86).
- 46** Die Vermutung wirkt **für und gegen jeden**, auch gegen den **Erbscheinserben** (s D 308 V 567). § 2365 enthält aber keine Fiktion dergestalt, dass der durch den Erbschein legitimierte Erbe als Vertreter des wirklichen Erben gilt (s WILKE Anm 1; ESSLINGER 83). Rechtsgeschäfte kommen daher grds nur zwischen Dritten und dem Erbscheinserben zustande. Etwas anderes kann sich aus §§ 2366 f ergeben. Hinsichtlich der Ansprüche des wirklichen Erben auf das, was der Erbschaftsbesitzer durch Rechtsgeschäft mit Mitteln der Erbschaft erwirbt, kommt eine **dingliche Surrogation** nach § 2019 in Betracht.
- 47** Wurde ein Prozess nach dem Tod einer Partei nach §§ 239, 246 ZPO ausgesetzt, so bedarf es für die Fortsetzung der Klärung der Erbfolge. Dies ist mit Erteilung des Erbscheins idR gegeben (OLG Rostock NJW-RR 2007, 69; BeckOK/SIEGMANN/HÖGER Rn 10a).
- b) Widerlegung der Vermutung**
- 48** Die Rechtsvermutung kann widerlegt werden (s dazu ROSENBERG, Die Beweislast § 16 II):
- dadurch, dass die **Einziehung** oder Kraftloserklärung des Erbscheins gemäß § 2361 oder die **Ablieferung** des Zeugnisses an das Nachlassgericht gemäß § 2362 herbeigeführt wird (MünchKomm/J MAYER § 2365 Rn 8);
  - durch den **Beweis**, dass die Voraussetzungen der Vermutung (wirksamer Erbschein und Identität des Inhabers, s oben Rn 14 ff) nicht vorliegen; denn ohne Feststehen des Vermutungstatbestands kann die Vermutungsfolge nicht eintreten;
  - durch den **Beweis des Gegenteils** (s dazu Mot V 567; D 308), dh den Beweis der Unrichtigkeit des Erbscheins; insofern wird die Vorschrift des § 292 ZPO, der nur von Vermutungen über das Vorhandensein einer Tatsache spricht, allgemein für entsprechend anwendbar gehalten (SOERGEL/ZIMMERMANN Rn 2; SCHILKEN, Zivilprozessrecht [5. Aufl 2006] Rn 471).

Als *Hauptbeweis* kann der Beweis des Gegenteils durch zulässige Beweismittel jeder Art – auch durch Parteivernehmung – geführt werden (NK-BGB/KROISS § 2353 Rn 88; ROSENBERG/SCHWAB/GOTTWALD [15. Aufl 1993] § 112 II 4; ROSENBERG, Die Beweislast § 16 II 4). Im beweisrechtlichen Sinne kommt der Beweis des Gegenteils gegen die Vermutung des Erbrechts einer Prozesspartei eigentlich nur in Betracht, wenn Tatsachen (iS des Prozessrechts) streitig sind, aus denen sich die Unrichtigkeit des Erbscheins ergeben soll. Gehen beide Parteien hingegen zB von dem Vorhandensein eines Testamentes aus, und streiten sie nur über dessen Auslegung, so geht es nicht um einen (auf Tatsachen bezogenen) Gegenbeweis (ROSENBERG, Die Beweislast § 16 II 4 b, krit zu RGZ 92, 68). Auch in diesem Fall kann die Vermutung des § 2365 jedoch schon durch eine andere Rechtsüberzeugung des Prozessgerichts entkräftet werden (SOERGEL/ZIMMERMANN Rn 2; vgl auch RGZ 92, 68, 71; BGH NJW-RR 1987, 1090). Wird hingegen etwa die Echtheit des Testaments – also eine dem Erbrecht zugrunde liegende Tatsache – bestritten, so muss der Gegner des Vermutungsträgers die Tatsachen beweisen, aus denen sich die Unrichtigkeit der Vermutung für das Bestehen des Erbrechts ergibt. Was die beweismäßige Widerlegung der Rechtsvermutung des § 2365 (und des § 2368 S 2) angeht, so kann der Beweis des Gegenteils unter Umständen dem gleichen Beweismaterial, das bereits bei Schaffung der die Rechtsvermutung begründenden Urkunde vorgelegen hat, entnommen werden (s RGZ 92, 68; OLG Nürnberg WM 1962, 1200; vgl auch OLG Düsseldorf FamRZ 2001, 123, 124). Der Beweis muss aber jede Möglichkeit ausräumen, dass das beurkundete Recht, sei es auch in anderer Weise, zur Entstehung gelangt ist. Solange dies nicht geschehen ist, ist auch der Prozessrichter an die gesetzliche Vermutung gebunden.

**c) Keine Anwendung im Erbrechtsstreit unter Erbprätendenten?**

Zunächst wurde vertreten, dass die Vermutung des § 2365 uneingeschränkt auch im **48a** Verhältnis zu Erbprätendenten gilt (PLANCK/GREIFF § 2365 Anm 4a mwNw; dem heute noch zugeneigt mit beachtlichen Argumenten MUSCHELER, Erbrecht II Rn 3343 mwNw; ders Jura 2009, 731, 734 ff).

Im Anschluss an die Rechtsprechung des Reichsgerichts (RG WarnR 1913 Nr 300 = **49** SeuffBl 78, 322; DRW 1944/45, 399 im Gegensatz zu den Mot V 567) schränkte schon die sodann hM (BGB-RGRK/KREGEL Rn 4; ERMAN/SIMON Rn 4; EBENROTH Rn 1060; KIPP/COING § 103 I Fn 5; ROSENBERG, Die Beweislast § 16 II 4 b; KLAER 34; HEINSHEIMER LZ 1915 Sp 1276; JOSEF JherJb 65, 161 und ZZP 47, 270; ferner STAUDINGER/FIRSCHING<sup>12</sup> Rn 25; BARTHOLOMEYCZIK 269; s auch LG Hagen NJW 1966, 1660) den Umfang der Vermutungswirkung für den Erbrechtsstreit unter Erbprätendenten ein, jedoch auf einseitige Art und Weise: Die Erteilung des Erbscheins verschaffe dem Empfänger des Erbscheins eine Art von Besitz der Erbschaft, der mit dem Vorteil der Verteidigungslage verbunden sei. Wer im Widerspruch mit dem durch den Erbschein festgestellten Erbrecht für sich ein Erbrecht in Anspruch nehme, müsse deshalb als Kläger auftreten und, um im Prozess zu obsiegen, den Nachweis eines Rechtes führen. Insofern sei die Ausstellung des Erbscheins für die Bestimmung der Parteirolle im Prozess und damit zugleich für die Beweislast von Einfluss. Zur Führung des Beweises des Gegenteils gegenüber dem Erbschein habe der als gesetzlicher Erbe auftretende Kläger nur die Pflicht, nach den die Beweislastverteilung bei der Erbschaftsklage regelnden allgemeinen Grundsätzen die sein gesetzliches Erbrecht ergebenden Tatsachen nachzuweisen, während der Beklagte trotz der Vermutung des ihm zur Seite stehenden Erbscheins die zur Ausschließung jenes Erbrechts dienlichen Tatsachen, zB die Echtheit eines



Testaments nachweisen müsse (für eine Anwendung des § 2365 hingegen schon früh PLANCK/GREIFF Anm 4a; vLÜBTOW II 1023; WEISSLER I 341; FISCHER JherJb 63, 269; SIBER JW 1922, 490; offen gelassen von BGHZ 47, 58). Andererseits sei der Erbscheinsvermutung im Erbrechtsstreit jedoch nicht jegliche Bedeutung abzusprechen: Trete der **Inhaber des Erbscheins als Kläger** auf, so brauche er nur die Rechtsbehauptung eines Erbrechts aufzustellen; die Vermutung des § 2365 befreie ihn von der Angabe und dem Beweis der sein Erbrecht begründenden Tatsachen (RG WarnA 1913 Nr 300; RG DVA 1944, 339; OLG München ZEV 1995, 459).

**50** Indessen darf nicht der Zufall der Parteirollen über die Beweislast und damit uU über den Ausgang des Prozesses entscheiden (vgl auch ROSENBERG, Die Beweislast § 16 II 4 b; MUSCHELER ErbR II Rn 3344). Nicht nur aus diesem Grund hat sich schließlich bis heute die Ansicht durchgesetzt, dass der Vermutungswirkung des § 2365 unter Erbanwärtern **keine Bedeutung** zukommt (ganz hM; NK-BGB/KROISS Rn 12; Hk-BGB/HOEREN § 2359 Rn 6; BeckOK/SIEGMANN/HÖGER Rn 11; PALANDT/WEIDLICH Rn 3; Münch-Komm/J MAYER § 2365 Rn 22 f; SOERGEL/ZIMMERMANN Rn 4; LANGE, Erbrecht § 78 Rn 85; BROX/WALKER Rn 625; LANGE/KUCHINKE § 39 VII 2 e; LEIPOLD Rn 655; vLÜBTOW II 1024), also auch dann nicht, wenn der Erbscheinsinhaber als Kläger auftritt.

**50a** Fest steht, dass der Ausgang des Erbscheinsverfahrens keinerlei präjudizielle Wirkung auf den Streit zwischen Erbprätendenten und das Erbrecht hat (BVerfG NJW-RR 2005, 1600, 1601; BGH NJW 1967, 1124; OLG München NJW-RR 1995, 779, 780). Daran würde die Anwendung von § 2365 aber auch nicht rütteln (so aber offenbar MünchKomm/J MAYER § 2365 Rn 22 ff). Allein die Beweislast würde umgekehrt. Dass sich diese nicht nach der Parteirolle richten darf, ist richtig. Wer dem Erbschein eine zumindest indizielle Bedeutung abspricht, lässt die Erkenntnis der Amtsermittlung aus dem Erbscheinsverfahren außen vor und dies ohne Not: Der Wortlaut des § 2365 schränkt die Vermutungswirkung gegenüber Erbprätendenten nicht ein und auch die Motive (V S 567) gehen davon aus, dass die Vermutung gegenüber jedermann, auch gegenüber Erbprätendenten gilt. Daher ist mit MUSCHELER (ErbR II Rn 3344) § 2365 uneingeschränkt im Streit von Erbprätendenten anzuwenden. Wer die Richtigkeit des Erbscheins bezweifelt, muss den Beweis des Gegenteils erbringen (s a WENDT in Anm zu OLG Celle 9. 11. 2015 – Az 6 W 204/15, ErbR 05/2016).

**51** Für die Beziehungen des Erbscheinsträgers zu Dritten, die nicht Erbanwärter sind, greifen die Bedenken gegen die Anwendung von § 2365 jedenfalls nicht, weil die Parteien in einem solchen Prozess nicht um das Erbrecht streiten, sondern die Erbenstellung lediglich Voraussetzung für das dort jeweils im Streit befindliche Rechtsverhältnis ist (so auch RGZ 92, 68; ZIMMERMANN Rn 750, wohl unstr, jedenfalls auch ROSENBERG, Die Beweislast § 16 II 4 b).

## V. Verhältnis zur Vermutung des § 1964

**52** Dem Wesen und Grunde nach ähnlich, inhaltlich aber beschränkter als die Vermutung des § 2365, ist die nach § 1964 begründete Vermutung über die gesetzliche Erbeneigenschaft des Fiskus. Auch zur Eintragung des **Fiskus** als gesetzlichen Erben in das Grundbuch bedarf es trotz § 1964 eines Erbscheins (BayObLG Rpfleger 1987, 357).

## VI. Entsprechende Anwendung auf andere Zeugnisse

Auf das einem **Testamentsvollstrecker** nach § 2368 iVm § 354 Abs 2 FamFG sowie **53** auf das einem überlebenden Ehegatten hinsichtlich der **Fortsetzung der Gütergemeinschaft** nach § 1507 zu erteilende Zeugnis finden die Vorschriften über den Erbschein entsprechende Anwendung, somit auch die §§ 2365–2367.

Zur Vermutungswirkung von Erbscheinen aus der **früheren DDR** s Einl 38 ff zu §§ 2353 ff und MünchKomm/J MAYER § 2365 Rn 5. Zum Gutglaubensschutz des **Europäischen Nachlasszeugnisses** s Einl 161 zu §§ 2353 ff.

### § 2366

#### Öffentlicher Glaube des Erbscheins

**Erwirbt jemand von demjenigen, welcher in einem Erbschein als Erbe bezeichnet ist, durch Rechtsgeschäft einen Erbschaftsgegenstand, ein Recht an einem solchen Gegenstand oder die Befreiung von einem zur Erbschaft gehörenden Recht, so gilt zu seinen Gunsten der Inhalt des Erbscheins, soweit die Vermutung des § 2365 reicht, als richtig, es sei denn, dass er die Unrichtigkeit kennt oder weiß, dass das Nachlassgericht die Rückgabe des Erbscheins wegen Unrichtigkeit verlangt hat.**

**Materialien:** E I §§ 2077, 2078; II § 2230; III § 2339; Mot V 569–572; Prot V 684–686; VI 222; JAKOBS/SCHUBERT ER II 2143–2151.

#### Schrifttum

BENEDORF, Der öffentliche Glaube des Erbscheins nach dem Rechte des deutschen bürgerlichen Gesetzbuches (Diss Leipzig 1907)  
BOEHMER, Einführung in das bürgerliche Recht (2. Aufl 1965) 321  
EBEL, Gutgläubiger Erwerb einer Auflassungsvormerkung vom eingetragenen Scheineigentümer und Erbfall, NJW 1982, 724  
FISCHER, Die Vermutung und der öffentliche Glaube des Erbscheins (§§ 2365–2367 BGB) (Diss Heidelberg 1907)  
HÖLAND, Erwerberschutz durch Redlichkeit, AcP 1998, 539  
PARODI, Die Maßgeblichkeit der Kenntnis vom Erbschein für einen gutgläubigen Erwerb einer

beweglichen Sache nach § 2366 BGB, AcP 1985, 362  
vREIBNITZ, Der öffentliche Glaube des Erbscheins im Vergleich mit dem öffentlichen Glauben des Grundbuchs (Diss Berlin 1902)  
SCHÖLDGEN, Der öffentliche Glaube des Erbscheins (Diss Greifswald 1908)  
SOLMS-BARUTH, Der öffentliche Glaube des Erbscheins nach dem Rechte des BGB (Diss Leipzig 1916)  
WENDT, Verwaltung der Erbengemeinschaft – Kündigung eines Darlehensvertrages durch einen Miterben, ErbR 2015, 560  
WIEGAND, Rechtsableitung von Nichtberechtigten, JuS 1978, 145.
